# Supplementary material for: Anti-tumor activity of all-trans retinoic acid in gastric-cancer: gene-networks and molecular mechanisms
Source: PubMed Central journal article supplement (PMC10638833; doi:10.1186/s13046-023-02869-w), 2023-11-11
Supplement: 13046_2023_2869_MOESM1_ESM.pdf [file 13046_2023_2869_MOESM1_ESM.pdf]

## SUPPLEMENTARY INFORMATION

Title: Anti-tumor activity of All-Trans Retinoic Acid in gastric-cancer: gene-networks and molecular mechanisms

Guarrera Luca, Kurosaki Mami, Garattini Silvio Ken, Gianni' Maurizio, Fasola Gianpiero, Rossit Luca, Prisciandaro Michele, Di Bartolomeo Maria, Bolis Marco, Rizzo Paola, Nastasi Claudia, Foglia Marika, Zanetti Adriana, Paroni Gabriela, Terao Mineko and Garattini Enrico

### CONTENT

|                         |            |
|-------------------------|------------|
| Supplementary Methods   | page 2     |
| Legends to Tables S3-S5 | page 3     |
| Supplementary Table S1  | page 4     |
| Supplementary Table S2  | page 5     |
| Figure S1               | page 6     |
| Figure S2               | page 7     |
| Figure S3               | page 8     |
| Figure S4               | page 9     |
| Figure S5               | page 10    |
| Figure S6               | page 11    |
| Figure S7               | page 12    |
| Figure S8               | page 13    |
| Original Western blots  | page 14-28 |

## SUPPLEMENTARY METHODS

### *Short-term tissue slice cultures*

The short term tissue slice cultures were prepared and used as already described (Centritto F, Paroni G, Bolis M, Garattini SK, Kurosaki M, Barzago MM, et al. Cellular and molecular determinants of all-trans retinoic acid sensitivity in breast cancer: Luminal phenotype and RAR $\alpha$  expression. *EMBO Mol Med.* 2015;7:950–72). Briefly, tissue slices (thickness, 200  $\mu$ m) deriving from surgical specimens of 13 gastric cancer patients who underwent a diagnostic Tru-cut procedure were obtained within 24 hours from the resection. Tissue slices were challenged with vehicle (DMSO) or ATRA (1.0  $\mu$ M) for 48 hours in a 1:1 mixture of DMEM/F12 medium containing EGF (20 ng/ml), FGF (20ng/ml), insulin (5 $\mu$ g/ml), glucose (0.3%) in the presence *Antibiotic-Antimycotic* solution (GIBCO). At the end of the treatment, samples were fixed, paraffin-included, and dissected into 5- $\mu$ m slices, which were subjected to immuno-histochemical staining with an antibody targeting the Ki67 proliferation-associated marker. The percentage of Ki67-positive tumor cells in the various samples was assessed in a quantitative manner by automatic image analysis. Scoring of Ki67 was blinded as to treatment. Each value represents the mean  $\pm$  SE of at least five separate fields for each experimental sample.

### *Summary of the predicted ATRA-scores and histological characteristics of the gastric-cancer patients available in the TCGA database*

Total No. of Diffuse Type Stomach Adenocarcinoma = 63; cases with calculated *ATRA-score*  $\geq 0.55$  = 35 (56%); with calculated *ATRA-score*  $< 0.55$  = 28 (44%)

Total No. of Mucinous Stomach Adenocarcinoma = 19; cases with calculated *ATRA-score*  $\geq 0.55$  = 10 (53%); with calculated *ATRA-score*  $< 0.55$  = 9 (47%)

Total No. of Papillary Stomach Adenocarcinoma = 5; cases with calculated *ATRA-score*  $\geq 0.55$  = 0 (0%); with calculated *ATRA-score*  $< 0.55$  = 5 (100%)

Total No. of Signet Ring Cell Carcinoma of the Stomach = 12; cases with calculated *ATRA-score*  $\geq 0.55$  = 6 (50%); with calculated *ATRA-score*  $< 0.55$  = 6 (50%)

Total No. of Stomach Adenocarcinoma = 207; cases with calculated *ATRA-score*  $\geq 0.55$  = 87 (42%); with calculated *ATRA-score*  $< 0.55$  = 120 (58%)

Total No. of Tubular Stomach Adenocarcinoma = 69; cases with calculated *ATRA-score*  $\geq 0.55$  = 22 (32%); with calculated *ATRA-score*  $< 0.55$  = 47 (68%)

## LEGENDS TO SUPPLEMENTARY TABLES S3-S5

**Table S3** *Characteristics of the gastric-cancer patients used for the studies involving tissue-slice cultures*

The table summarizes the clinical characteristics of the 13 patients considered.

**Table S4** *RNA-sequencing data*

The table contains the processed *RNA-seq* data obtained with our panel of gastric cancer cell-lines exposed to vehicle and ATRA.

**Table S5** *Effects of ATRA on the expression of the RNAs derived from endogenous retroviruses*

The table contains the levels of endogenous retroviral RNAs determined by *RNA-seq* data obtained from the indicated cell lines exposed to vehicle and ATRA.

| Cell line         | Group                                       | Cellosaurus Expasy | Source         | Cluster       |
|-------------------|---------------------------------------------|--------------------|----------------|---------------|
| <i>231132/87</i>  | Gastric adenocarcinoma                      | CVCL_1046          | DSMZ ACC-201   | <i>G-INT</i>  |
| <i>AGS</i>        | Gastric adenocarcinoma                      | CVCL_0139          | ATCC CRL-1739  | <i>G-INT</i>  |
| <i>GSU</i>        | Gastric carcinoma                           | CVCL_8877          | RIKEN RCB2278  | <i>G-INT</i>  |
| <i>HuG1-N</i>     | Gastric tubular adenocarcinoma              | CVCL_4846          | RIKEN RCB1178  | <i>G-INT</i>  |
| <i>IM95</i>       | Gastric adenocarcinoma                      | CVCL_2961          | JCRB1075.0     | <i>G-INT</i>  |
| <i>KATO-III</i>   | Signet ring cell gastric adenocarcinoma     | CVCL_0371          | ATCC HTB-103   | <i>G-INT</i>  |
| <i>KE-39</i>      | Stomach adenocarcinoma                      | CVCL_3385          | RIKEN RCB1434  | <i>G-INT</i>  |
| <i>MKN45</i>      | Gastric adenocarcinoma                      | CVCL_0434          | DSMZ ACC-409   | <i>G-INT</i>  |
| <i>NCI-N87</i>    | Gastric tubular adenocarcinoma              | CVCL_1603          | ATCC CRL-5822  | <i>G-INT</i>  |
| <i>NUGC-4</i>     | Signet ring cell gastric adenocarcinoma     | CVCL_3082          | JCRB0834       | <i>G-INT</i>  |
| <i>OCUM-1</i>     | Signet ring cell gastric adenocarcinoma     | CVCL_3084          | JCRB0192       | C1            |
| <i>SNU-16</i>     | Gastric adenocarcinoma                      | CVCL_0076          | ATCC CRL-5974  | <i>G-INT</i>  |
| <i>SNU-5</i>      | Gastric adenocarcinoma                      | CVCL_0078          | ATCC CRL-5973  | <i>G-INT</i>  |
| <i>ECC10</i>      | Gastric small cell neuroendocrine carcinoma | CVCL_1188          | RIKEN RCB0983  | <i>G-DIFF</i> |
| <i>ECC12</i>      | Gastric small cell neuroendocrine carcinoma | CVCL_1189          | RIKEN RCB1009  | <i>G-DIFF</i> |
| <i>GCIY</i>       | Gastric adenocarcinoma                      | CVCL_1228          | RIKEN RCB0555  | <i>G-DIFF</i> |
| <i>GSS</i>        | Gastric carcinoma                           | CVCL_8876          | RIKEN RCB2277  | <i>G-DIFF</i> |
| <i>HGC-27</i>     | Gastric carcinoma                           | CVCL_1279          | ECACC 94042256 | <i>G-DIFF</i> |
| <i>Hs746.T</i>    | Gastric adenocarcinoma                      | CVCL_0333          | ATCC HTB-135   | <i>G-DIFF</i> |
| <i>LMSU</i>       | Signet ring cell gastric adenocarcinoma     | CVCL_5081          | RIKEN RCB1062  | <i>G-DIFF</i> |
| <i>MKN1</i>       | Gastric adenosquamous carcinoma             | CVCL_1415          | JCRB0252       | <i>G-DIFF</i> |
| <i>MKN7</i>       | Gastric tubular adenocarcinoma              | CVCL_1417          | JCRB1025       | <i>G-DIFF</i> |
| <i>MKN74</i>      | Gastric tubular adenocarcinoma              | CVCL_2791          | JCRB0255       | <i>G-DIFF</i> |
| <i>NUGC-3</i>     | Gastric adenocarcinoma                      | CVCL_1612          | JCRB0822       | <i>G-DIFF</i> |
| <i>RERF-GC1-B</i> | Gastric carcinoma                           | CVCL_3152          | JCRB1009       | <i>G-DIFF</i> |
| <i>SH-10-TC</i>   | Mucinous gastric adenocarcinoma             | CVCL_5167          | RIKEN RCB1940  | <i>G-DIFF</i> |
| <i>SNU-1</i>      | Gastric adenocarcinoma                      | CVCL_0099          | ATCC CRL-5971  | <i>G-DIFF</i> |

**Table S1** Characteristics and source of the gastric-cancer cell-lines

The cell-lines characterized by a *G-INT* and a *G-DIFF* phenotype are marked in blue and red, respectively. All the cell-lines used throughout the study were free from mycoplasma contamination.

|                            |                                                                |
|----------------------------|----------------------------------------------------------------|
| <i>sh-IRF1a sense</i>      | GATCCGATACAAAGCAGGGGAAAACTTCCTGTCAGATTTTCCCCTGCTTTGTATCTTTTGG  |
| <i>sh-IRF1a antisense</i>  | AATTCAAAAAGATACAAAGCAGGGGAAAACTGACAGGAAGTTTCCCCTGCTTTGTATCG    |
| <i>sh-IRF1b sense</i>      | GATCCCCCTGATACCTTCTCTGATCTTCCTGTCAGAATCAGAGAAGGTATCAGGGTTTTTGG |
| <i>sh-IRF1b antisense</i>  | AATTCAAAAACCCTGATACCTTCTCTGATCTGACAGGAAGATCAGAGAAGGTATCAGGGG   |
| <i>sh-CTRL1 sense</i>      | GATCCGAACTCAGGATCTTTGGTACTTCCTGTCAGATACCAAAGATCCTGAGTTCTTTTGG  |
| <i>sh-CTRL1 antisense</i>  | AATTCAAAAAGAACTCAGGATCTTTGGTATCTGACAGGAAGTACCAAAGATCCTGAGTTCG  |
| <i>sh-DHRS3a sense</i>     | GATCCCTAATGGACAGTGATGATCTTCCTGTCAGAATCATCACTGTCCATTAGGTTTTTGG  |
| <i>sh-DHRS3a antisense</i> | AATTCAAAAACCTAATGGACAGTGATGATCTGACAGGAAGATCATCACTGTCCATTAGGG   |
| <i>sh-DHRS3b sense</i>     | GATCCCTGCATGAACACTTTCAACTTCCTGTCAGATTGAAAGTGTTCATGCAGGTTTTTGG  |
| <i>sh-DHRS3b antisense</i> | AATTCAAAAACCTGCATGAACACTTTCAACTGACAGGAAGTTGAAAGTGTTCATGCAGGG   |
| <i>sh-CTRL2 sense</i>      | GATCCCAATGCGCAAGAAGATCAACTTCCTGTCAGATTGATCTTCTTGCGCATTGTTTTTGG |
| <i>sh-CTRL2 antisense</i>  | AATTCAAAAACAATGCGCAAGAAGATCAACTGACAGGAAGTTGATCTTCTTGCGCATTGG   |

**Table S2** Structure of the double stranded DNAs used for the construction of the shRNA plasmid constructs

The sequences of the sense and antisense strands of the oligonucleotides targeting the *IRF1* and *DHRS3* genes as well as the scramble control oligonucleotides (*CTRL1* and *CTRL2*) are illustrated. The nucleotides marked in red constitute the *EcoRI* and *BamHI* sites used for the insertion of the double-stranded oligonucleotides into the *pGreenPuro* plasmid. The nucleotides marked in black represent the sequences corresponding to different targeted regions of the *IRF1* (*shIRF1a* = exon 4, nucleotides 4-22; *shIRF1b* = exon 6, nucleotides 18-36) and *DHRS3* genes (*shDHRS3a* = exon 3, nucleotides 54-72; *shDHRS3b* = exon 6, nucleotides 54-72). In *shCTRL1* and *shCTRL2* the nucleotides marked in black are scrambled and non-targeting oligonucleotides. In each oligonucleotide the black sequences are separated by an *L12* loop marked in green.

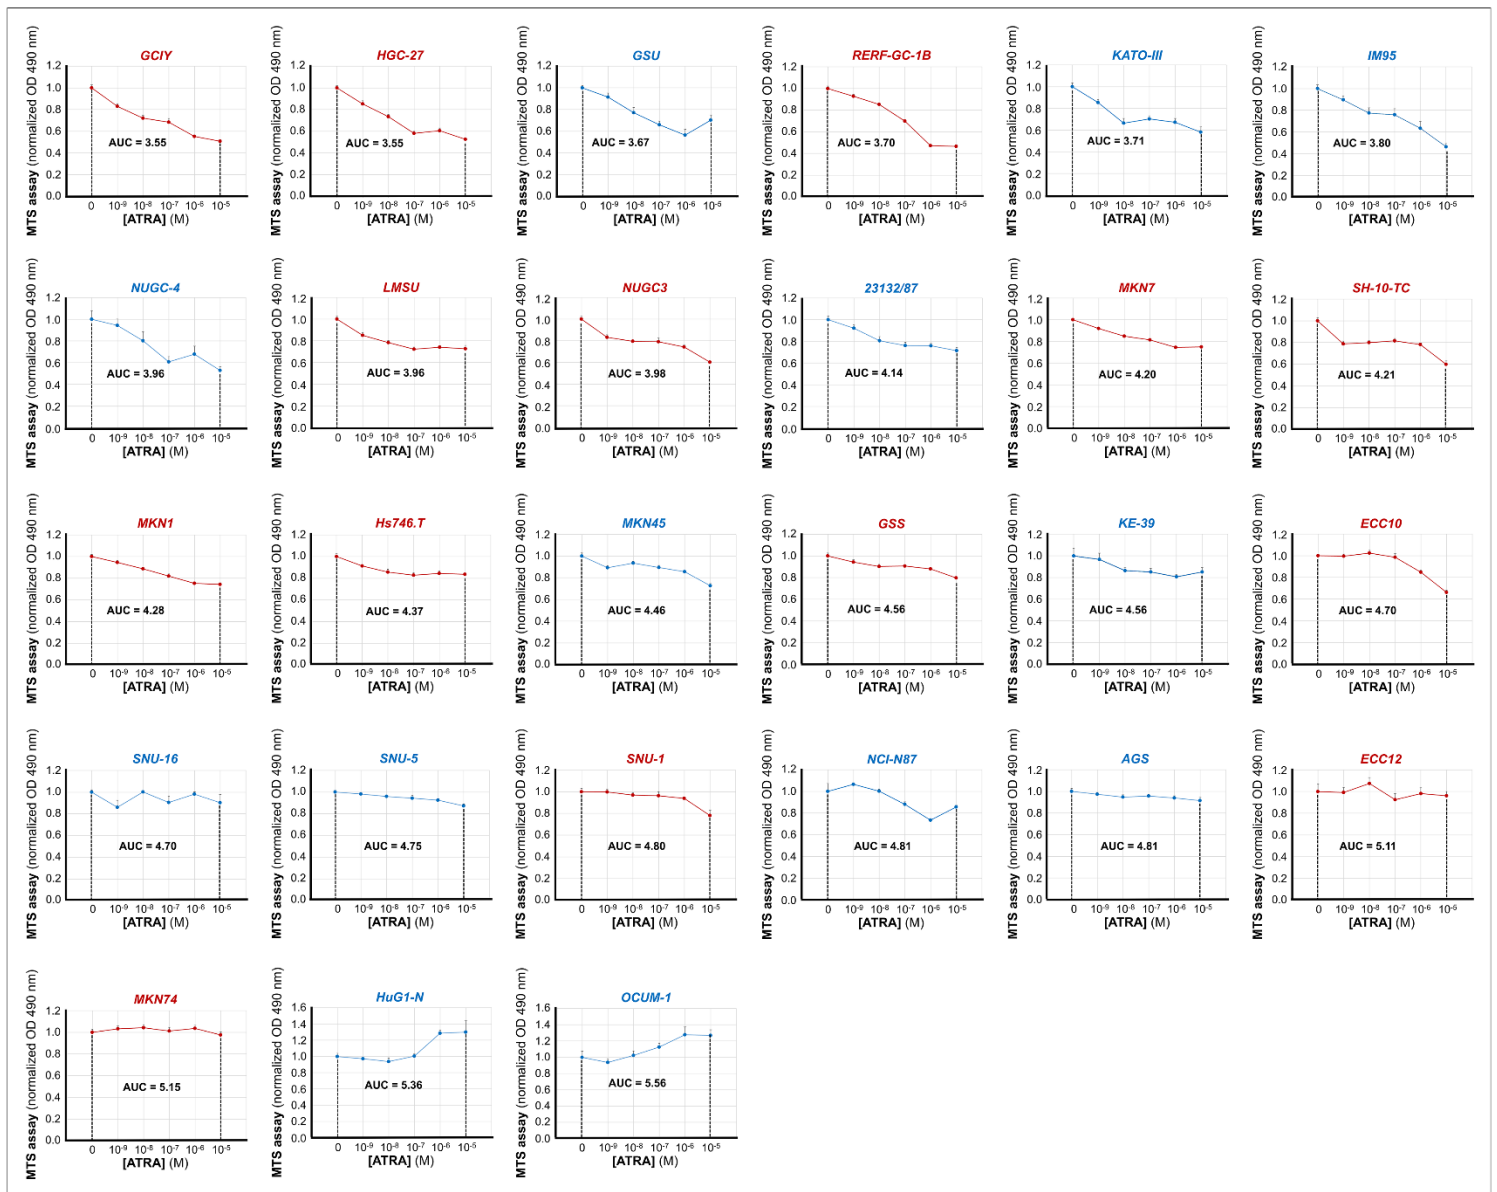

**Figure S1** Growth curves of the gastric cancer cell-lines exposed to increasing concentrations of ATRA

The indicated and exponentially growing cell-lines were exposed to vehicle or 5 increasing concentrations of ATRA ( $10^{-9}$  to  $10^{-5}$  M) for 6 days. At the end of the treatment, cell-lines were subjected to MTS assays to determine their growth. Each value represents the Mean  $\pm$  SE of 10 independent cultures with the exception of *HuG1-N*, *OCUM-1*, *SNU-1*, *SNU-5* and *SNU-16* cells where each value is the Mean  $\pm$  SE of 4 independent cultures. The Area-Under-the-Curve (AUC) value, which was used for the calculation of the ATRA-scores, is indicated for each growth curve.

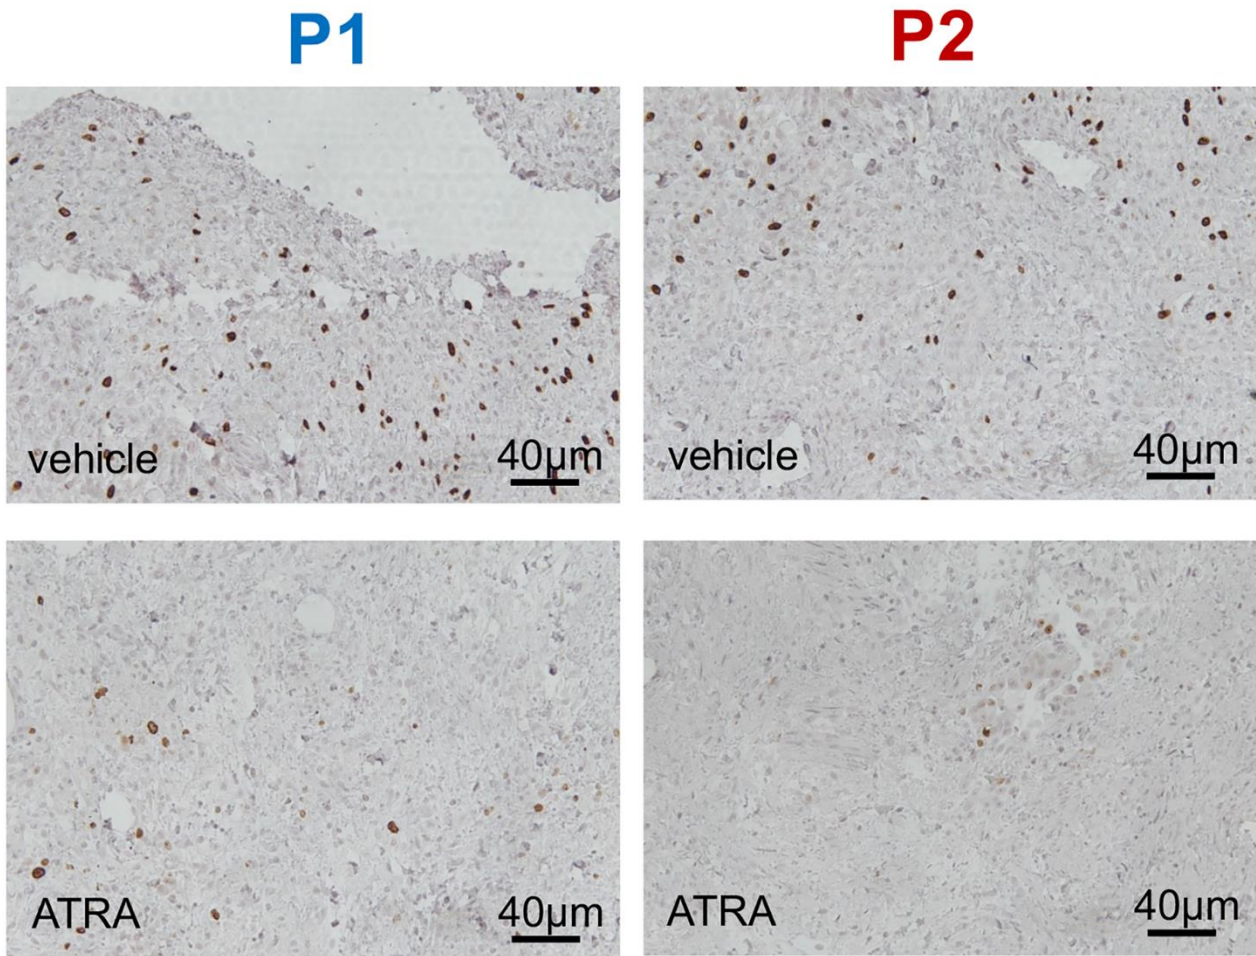

**Figure S2** *Ki67* immune-histochemistry in tissue-slice cultures of representative primary gastric-cancers exposed to ATRA

Tissue slices deriving from surgical specimens of 13 separate patients (P1-P13) were challenged with vehicle (DMSO) or ATRA (1.0  $\mu\text{M}$ ) for 48 hours. Tumor slices were fixed, paraffin embedded, cut into 5  $\mu\text{m}$  slices and stained for the *Ki67* protein using a specific antibody. The case characterized by a *G-INT* phenotype is marked in blue, the case characterized by a *G-DIFF* phenotype is marked in red. The figure illustrates examples of the immuno-histochemical data obtained in two representative cases: (i) Patient 1 (P1), *G-INT* case; (ii) Patient 2 (P2), *G-DIFF* case.

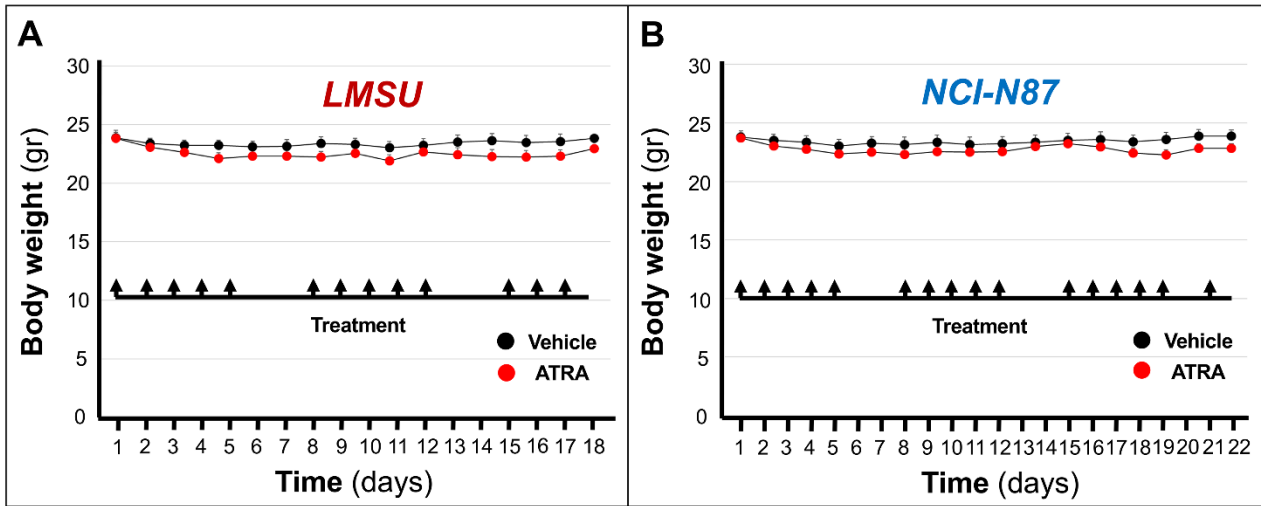

**Figure S3** Effects of ATRA on the body weight of SCID mice transplanted with *LMSU* and *NCI-N87* cells

Ten *Nude* mice/experimental group were xeno-transplanted with human *LMSU* (A) and *NCI-N87* (B) gastric-cancer cell-lines. Subsequently, mice were treated with vehicle (DMSO) or ATRA (15mg/kg) intra-peritoneally at the indicated time points (arrows). The total body weight of each animal was determined and the results are shown as the Mean $\pm$ SD of the values.



| HALLMARK                          | High Sensitivity |                  |              |                  |                  |              |                 | Low Sensitivity |              |                 |                 |              |                  |  |
|-----------------------------------|------------------|------------------|--------------|------------------|------------------|--------------|-----------------|-----------------|--------------|-----------------|-----------------|--------------|------------------|--|
|                                   | GCIY             | HGC-27           | GSU          | RERF-GC-1B       | KATO-III         | IM95         | LMSU            | MKN45           | GSS          | AGS             | NCI-N87         | HuG1-N       | OCUM-1           |  |
| ADIPOGENESIS                      | 6.6 (0.2)        | 7.9 (0.2)        | 2.3 (0.6)    | 1.9 (0.6)        | 0.6 (0.9)        | 0.4 (0.9)    | 0.4 (0.9)       | 25.6 (0.01*)    | 9.1 (0.1)    | 1.9 (0.7)       | 0.6 (0.9)       | 2.4 (0.6)    | 44.5 (4.0E-05*)  |  |
| ALLOGRAFT_REJECTION               | 19.8 (0.01*)     | 7.4 (0.2)        | 1.2 (0.8)    | 2.3 (0.6)        | 31.0 (0.01*)     | 0.4 (0.9)    | 8.1 (0.2)       | 0.3 (0.9)       | 0.1 (1.0)    | 7.2 (0.2)       | 3.6 (0.4)       | 2.4 (0.6)    | 0.8 (0.8)        |  |
| ANDROGEN_RESPONSE                 | 3.3 (0.5)        | 17.3 (0.02*)     | 1.1 (0.8)    | 0.9 (0.8)        | 1.5 (0.7)        | 3.7 (0.4)    | 0.4 (0.9)       | 7.0 (0.2)       | 0.1 (1.0)    | 2.4 (0.6)       | 1.5 (0.7)       | 3.6 (0.4)    | 15.4 (0.03*)     |  |
| ANGIOGENESIS                      | 4.9 (0.3)        | 24.1 (0.01*)     | 3.8 (0.4)    | 9.2 (0.1)        | 1.0 (0.8)        | 0.2 (0.9)    | 16.3 (0.02*)    | 1.4 (0.7)       | 6.3 (0.2)    | 3.4 (0.4)       | 3.6 (0.4)       | 2.4 (0.6)    | 2.7 (0.5)        |  |
| APICAL_JUNCTION                   | 23.3 (0.01*)     | 28.9 (0.01*)     | 26.9 (0.01*) | 0.9 (0.8)        | 2.4 (0.6)        | 0.4 (0.9)    | 0.7 (0.9)       | 2.2 (0.6)       | 9.1 (0.1)    | 4.8 (0.3)       | 3.6 (0.4)       | 2.5 (0.6)    | 0.2 (1.0)        |  |
| APICAL_SURFACE                    | 8.9 (0.1)        | 4.3 (0.4)        | 1.3 (0.7)    | 8.0 (0.2)        | 1.2 (0.7)        | 0.1 (1.0)    | 3.1 (0.5)       | 1.6 (0.7)       | 1.7 (0.7)    | 5.5 (0.3)       | 3.6 (0.4)       | 1.0 (0.8)    | 4.4 (0.4)        |  |
| APOPTOSIS                         | 1.7 (0.7)        | 61.0 (7.8E-07*)  | 9.8 (0.1*)   | 13.5 (0.04*)     | 13.5 (0.05*)     | 0.2 (0.9)    | 16.5 (0.02*)    | 1.2 (0.8)       | 1.9 (0.6)    | 0.6 (2.3)       | 1.3 (0.7)       | 2.5 (0.6)    | 0.2 (0.9)        |  |
| BILE_ACID_METABOLISM              | 0.4 (0.9)        | 4.9 (0.3)        | 0.4 (0.9)    | 2.4 (0.6)        | 1.2 (0.7)        | 2.9 (0.5)    | 0.3 (0.9)       | 15.1 (0.03*)    | 7.6 (0.2)    | 2.4 (0.6)       | 0.6 (0.9)       | 1.2 (0.8)    | 7.6 (0.2)        |  |
| CHOLESTEROL_HOMEOSTASIS           | 33.8 (0.01*)     | 0.1 (0.9)        | 14.9 (0.03*) | 4.5 (0.4)        | 1.0 (0.8)        | 6.1 (0.2)    | 13.0 (0.05*)    | 11.2 (0.07*)    | 2.7 (0.5)    | 46.4 (2.3E-05*) | 5.4 (0.3)       | 7.9 (0.2)    | 7.6 (0.2)        |  |
| COAGULATION                       | 3.4 (0.5)        | 61.0 (7.8E-07*)  | 16.5 (0.02*) | 2.3 (0.6)        | 12.9 (0.05*)     | 0.1 (1.0)    | 15.6 (0.03*)    | 2.2 (0.6)       | 0.1 (1.0)    | 2.4 (0.6)       | 6.0 (0.3)       | 1.3 (0.7)    | 4.4 (0.4)        |  |
| COMPLEMENT                        | 3.4 (0.5)        | 35.4 (0.01*)     | 11.6 (0.07*) | 19.9 (0.01*)     | 21.7 (0.01*)     | 0.4 (0.9)    | 16.3 (0.02*)    | 0.2 (0.9)       | 1.5 (0.7)    | 0.1 (1.0)       | 3.5 (0.4)       | 1.6 (0.7)    | 3.6 (0.4)        |  |
| DNA_REPAIR                        | 24.9 (0.01*)     | 3.4 (0.5)        | 2.3 (0.6)    | 19.8 (0.01*)     | 4.1 (0.4)        | 0.1 (1.0)    | 4.8 (0.3)       | 2.2 (0.9)       | 0.2 (0.9)    | 0.3 (0.9)       | 1.0 (0.8)       | 2.4 (0.6)    | 4.6 (0.3)        |  |
| EZF_TARGETS                       | 147.3 (1.8E-15*) | 58.5 (1.4E-06*)  | 1.6 (0.7)    | 218.2 (1.5E-22*) | 53.6 (4.4E-06*)  | 13.6 (0.04*) | 28.2 (0.01*)    | 2.2 (0.6)       | 8.7 (0.1)    | 0.1 (1.0)       | 36.0 (0.01*)    | 0.2 (1.0)    | 48.3 (1.0E-05*)  |  |
| EPITHELIAL_MESENCHYMAL_TRANSITION | 4.9 (0.3)        | 121.8 (6.5E-13*) | 16.5 (0.02*) | 15.3 (0.03*)     | 0.2 (0.9)        | 0.4 (0.9)    | 6.3 (0.2)       | 2.2 (0.6)       | 0.1 (1.0)    | 2.3 (0.6)       | 3.6 (0.4)       | 14.2 (0.04*) | 0.4 (4.2)        |  |
| ESTROGEN_RESPONSE_EARLY           | 2.7 (0.5)        | 35.2 (0.01*)     | 26.6 (0.01*) | 32.1 (0.01*)     | 1.0 (0.8)        | 0.2 (0.9)    | 10.9 (0.08*)    | 2.2 (0.6)       | 25.8 (0.01*) | 0.4 (0.9)       | 0.1 (1.0)       | 1.0 (0.8)    | 11.2 (0.08*)     |  |
| ESTROGEN_RESPONSE_LATE            | 1.7 (0.7)        | 8.7 (0.1)        | 18.2 (0.01*) | 10.7 (0.09*)     | 1.5 (0.7)        | 0.4 (0.9)    | 1.7 (0.7)       | 0.8 (0.8)       | 7.5 (0.2)    | 7.2 (0.2)       | 3.4 (0.5)       | 1.0 (0.8)    | 18.2 (0.02*)     |  |
| FATTY_ACID_METABOLISM             | 2.7 (0.5)        | 21.9 (0.01*)     | 0.1 (0.9)    | 0.1 (1.0)        | 1.4 (0.7)        | 0.2 (0.9)    | 3.1 (0.5)       | 35.6 (0.01*)    | 2.7 (0.5)    | 7.2 (0.2)       | 2.1 (0.6)       | 2.2 (0.6)    | 46.7 (2.0E-05*)  |  |
| G2M_CHECKPOINT                    | 60.4 (9.1E-07*)  | 43.7 (0.01*)     | 1.3 (0.7)    | 144.7 (3.4E-15*) | 53.6 (4.4E-06*)  | 24.6 (0.01*) | 12.4 (0.06*)    | 8.6 (0.1)       | 9.1 (0.1)    | 0.9 (0.8)       | 31.9 (0.01*)    | 5.5 (0.3)    | 23.4 (0.01*)     |  |
| GLYCOLYSIS                        | 2.9 (0.5)        | 0.1 (0.9)        | 1.6 (0.7)    | 5.0 (0.3)        | 5.1 (0.3)        | 0.4 (0.9)    | 13.7 (0.04*)    | 2.3 (0.6)       | 7.8 (0.2)    | 0.3 (0.9)       | 0.8 (0.8)       | 0.6 (0.9)    | 7.6 (0.2)        |  |
| HEDGEHOG_SIGNALING                | 34.0 (0.01*)     | 0.4 (0.9)        | 0.4 (0.9)    | 1.9 (0.6)        | 0.5 (0.9)        | 0.1 (1.0)    | 2.3 (0.6)       | 0.5 (0.9)       | 0.5 (0.9)    | 2.3 (0.6)       | 0.7 (0.8)       | 4.4 (0.4)    | 6.1 (0.2)        |  |
| HEME_METABOLISM                   | 7.9 (0.2)        | 2.6 (0.6)        | 4.1 (0.4)    | 2.2 (0.6)        | 1.4 (0.7)        | 0.1 (1.0)    | 0.8 (0.8)       | 1.4 (0.7)       | 0.1 (1.0)    | 3.4 (0.4)       | 0.6 (0.9)       | 2.2 (0.6)    | 3.5 (0.4)        |  |
| HYPOXIA                           | 3.4 (0.5)        | 28.5 (0.01*)     | 2.4 (0.6)    | 0.3 (0.9)        | 1.0 (0.8)        | 0.2 (0.9)    | 7.9 (0.2)       | 2.2 (0.6)       | 6.7 (0.2)    | 0.3 (0.9)       | 3.4 (0.5)       | 0.2 (1.0)    | 1.0 (0.8)        |  |
| IL2_STATS_SIGNALING               | 3.4 (0.5)        | 47.6 (0.01*)     | 3.8 (0.4)    | 5.9 (0.3)        | 0.2 (0.9)        | 0.4 (0.9)    | 8.0 (0.2)       | 0.5 (0.9)       | 3.7 (0.4)    | 2.3 (0.6)       | 3.6 (0.4)       | 2.5 (0.6)    | 0.2 (0.9)        |  |
| IL6_JAK_STATS_SIGNALING           | 2.7 (0.5)        | 17.5 (0.02*)     | 1.6 (0.7)    | 3.3 (0.5)        | 6.9 (0.2)        | 0.4 (0.9)    | 28.2 (0.01*)    | 1.7 (0.7)       | 2.3 (0.6)    | 2.1 (0.6)       | 3.6 (0.4)       | 2.3 (0.6)    | 0.7 (0.8)        |  |
| INFLAMMATORY_RESPONSE             | 7.7 (0.2)        | 11.2 (0.08*)     | 2.4 (0.6)    | 4.5 (0.4)        | 1.5 (0.7)        | 0.1 (1.0)    | 16.5 (0.02*)    | 2.2 (0.6)       | 3.3 (0.5)    | 8.0 (0.2)       | 3.6 (0.4)       | 2.3 (0.6)    | 1.5 (0.7)        |  |
| INTERFERON_ALPHA_RESPONSE         | 45.4 (0.01*)     | 47.6 (0.01*)     | 0.4 (0.9)    | 35.7 (0.01*)     | 132.1 (6.2E-14*) | 0.4 (0.9)    | 34.1 (0.01*)    | 1.4 (0.7)       | 9.1 (0.1)    | 1.7 (0.7)       | 66.9 (2.0E-07*) | 11.6 (0.07*) | 1.4 (0.7)        |  |
| INTERFERON_GAMMA_RESPONSE         | 49.7 (0.01*)     | 32.6 (0.01*)     | 0.4 (0.9)    | 29.6 (0.01*)     | 122.1 (6.1E-13*) | 0.4 (0.9)    | 55.1 (3.1E-06*) | 2.0 (0.6)       | 7.5 (0.2)    | 2.7 (0.5)       | 46.1 (2.0E-05*) | 7.9 (0.2)    | 2.4 (0.6)        |  |
| KRAS_SIGNALING_DN                 | 6.1 (0.2)        | 0.9 (0.8)        | 3.8 (0.4)    | 1.9 (0.6)        | 2.2 (0.6)        | 4.4 (0.4)    | 3.1 (0.5)       | 1.4 (0.7)       | 0.7 (0.8)    | 19.9 (0.01*)    | 0.6 (0.9)       | 2.8 (0.5)    | 5.3 (0.3)        |  |
| KRAS_SIGNALING_UP                 | 2.7 (0.5)        | 15.4 (0.03*)     | 2.4 (0.6)    | 11.9 (0.06*)     | 10.4 (0.1*)      | 0.1 (1.0)    | 13.0 (0.05*)    | 0.5 (0.9)       | 2.5 (0.6)    | 8.0 (0.2)       | 3.6 (0.4)       | 1.3 (0.7)    | 2.7 (0.5)        |  |
| MITOTIC_SPINDLE                   | 5.3 (0.3)        | 1.9 (0.6)        | 1.3 (0.7)    | 15.9 (0.03*)     | 0.2 (0.9)        | 0.4 (0.9)    | 0.4 (0.9)       | 2.2 (0.6)       | 6.3 (0.2)    | 1.9 (0.6)       | 0.6 (0.9)       | 0.2 (1.0)    | 0.8 (0.8)        |  |
| MTORC1_SIGNALING                  | 8.9 (0.1)        | 10.3 (0.09*)     | 3.9 (0.4)    | 16.2 (0.02*)     | 0.9 (0.8)        | 4.2 (0.4)    | 3.1 (0.5)       | 0.2 (1.0)       | 0.2 (0.9)    | 12.5 (0.06)     | 6.7 (0.2)       | 4.7 (0.3)    | 42.6 (5.0E-05*)  |  |
| MYC_TARGETS_V1                    | 125.2 (3.0E-13*) | 42.3 (0.01*)     | 1.6 (0.7)    | 93.4 (4.5E-10*)  | 77.2 (1.9E-08*)  | 4.4 (0.4)    | 13.2 (0.05*)    | 0.5 (0.9)       | 3.7 (0.4)    | 71.1 (7.7E-8*)  | 64.9 (3.0E-07*) | 3.1 (0.5)    | 67.6 (2.0E-07*)  |  |
| MYC_TARGETS_V2                    | 144.8 (3.3E-15*) | 30.2 (0.01*)     | 2.4 (0.6)    | 33.6 (0.01*)     | 113.6 (4.4E-12*) | 24.6 (0.01*) | 7.7 (0.2)       | 2.2 (0.6)       | 9.1 (0.1)    | 71.1 (7.7E-8*)  | 44.1 (4.0E-05*) | 2.5 (0.6)    | 55.9 (3.0E-06*)  |  |
| MYOGENESIS                        | 17.1 (0.02*)     | 33.1 (0.01*)     | 10.0 (0.1*)  | 0.4 (0.9)        | 0.1 (1.0)        | 0.4 (0.9)    | 1.1 (0.8)       | 1.4 (0.7)       | 3.2 (0.5)    | 8.0 (0.2)       | 1.9 (0.6)       | 2.9 (0.5)    | 4.4 (0.4)        |  |
| NOTCH_SIGNALING                   | 2.7 (0.5)        | 4.3 (0.4)        | 10.2 (0.1*)  | 15.3 (0.03*)     | 0.6 (0.9)        | 0.4 (0.9)    | 2.3 (0.6)       | 0.5 (0.9)       | 1.6 (0.7)    | 14.9 (0.03*)    | 3.6 (0.4)       | 1.0 (0.8)    | 0.8 (0.8)        |  |
| OXIDATIVE_PHOSPHORYLATION         | 27.0 (0.01*)     | 61.1 (7.8E-07*)  | 1.6 (0.7)    | 10.2 (0.09*)     | 0.2 (0.9)        | 0.1 (1.0)    | 8.6 (0.1)       | 35.6 (0.01*)    | 8.7 (0.1)    | 3.1 (0.5)       | 1.0 (0.8)       | 7.9 (0.2)    | 111.7 (7.0E-12*) |  |
| P53_PATHWAY                       | 2.6 (0.5)        | 10.1 (0.1*)      | 3.8 (0.4)    | 3.0 (0.5)        | 0.1 (1.0)        | 0.4 (0.9)    | 0.4 (0.9)       | 1.7 (0.7)       | 3.9 (0.4)    | 0.1 (1.0)       | 2.6 (0.6)       | 1.0 (0.8)    | 0.2 (0.9)        |  |
| PANCREAS_BETA_CELLS               | 3.4 (0.5)        | 2.9 (0.5)        | 10.0 (0.1*)  | 0.4 (0.9)        | 6.1 (0.2)        | 13.6 (0.04*) | 10.9 (0.08*)    | 1.7 (0.7)       | 4.2 (0.4)    | 4.3 (0.4)       | 3.6 (0.4)       | 1.6 (0.7)    | 14.8 (0.03*)     |  |
| PEROXISOME                        | 6.1 (0.2)        | 0.6 (0.9)        | 1.3 (0.7)    | 0.9 (0.8)        | 5.3 (0.3)        | 0.1 (1.0)    | 2.6 (0.5)       | 8.6 (0.1)       | 3.7 (0.4)    | 3.0 (0.5)       | 1.0 (0.8)       | 4.4 (0.4)    | 18.7 (0.01*)     |  |
| PI3K_AKT_MTOR_SIGNALING           | 3.4 (0.5)        | 2.3 (0.6)        | 9.8 (0.1*)   | 4.8 (0.3)        | 0.2 (0.9)        | 0.2 (0.9)    | 1.1 (0.8)       | 0.5 (0.9)       | 0.1 (1.0)    | 0.1 (1.0)       | 2.5 (0.6)       | 1.3 (0.7)    | 0.8 (0.8)        |  |
| PROTEIN_SECRETION                 | 4.9 (0.3)        | 28.5 (0.01*)     | 4.1 (0.4)    | 2.6 (0.5)        | 28.4 (0.01*)     | 2.9 (0.5)    | 1.1 (0.8)       | 1.4 (0.7)       | 9.1 (0.1)    | 1.9 (0.6)       | 2.6 (0.6)       | 0.1 (1.0)    | 3.6 (0.4)        |  |
| REACTIVE_OXYGEN_SPECIES_PATHWAY   | 8.9 (0.1)        | 0.5 (0.9)        | 12.0 (0.06*) | 2.6 (0.5)        | 0.1 (1.0)        | 0.2 (0.9)    | 0.5 (0.9)       | 5.8 (0.3)       | 1.9 (0.6)    | 3.2 (0.5)       | 3.6 (0.4)       | 4.7 (0.3)    | 7.6 (0.2)        |  |
| SPERMATOGENESIS                   | 8.1 (0.2)        | 7.9 (0.2)        | 1.1 (0.8)    | 9.9 (0.1*)       | 2.9 (0.5)        | 3.0 (0.5)    | 1.9 (0.6)       | 1.4 (0.7)       | 3.3 (0.5)    | 4.0 (0.4)       | 3.6 (0.4)       | 2.2 (0.6)    | 0.7 (0.8)        |  |
| TGF_BETA_SIGNALING                | 8.1 (0.2)        | 39.7 (0.01*)     | 16.5 (0.02*) | 0.3 (0.9)        | 0.5 (0.9)        | 0.1 (1.0)    | 12.4 (0.06*)    | 2.2 (0.6)       | 2.1 (0.6)    | 0.1 (1.0)       | 0.6 (0.9)       | 1.0 (0.8)    | 9.9 (0.1)        |  |
| TNFA_SIGNALING_VIA_NFKB           | 2.2 (0.6)        | 48.1 (0.01*)     | 18.2 (0.02*) | 2.6 (0.5)        | 1.1 (0.8)        | 0.2 (0.9)    | 55.1 (3.1E-06*) | 2.2 (0.6)       | 7.8 (0.2)    | 41.0 (7.8E-05*) | 4.5 (0.4)       | 3.0 (0.5)    | 10.0 (0.1)       |  |
| UNFOLDED_PROTEIN_RESPONSE         | 3.8 (0.4)        | 0.1 (0.9)        | 1.9 (0.6)    | 9.2 (0.1)        | 1.5 (0.7)        | 0.1 (1.0)    | 14.3 (0.04*)    | 2.2 (0.6)       | 8.7 (0.1)    | 30.2 (9.6E-04*) | 3.6 (0.4)       | 0.2 (1.0)    | 18.7 (0.01)      |  |
| UV_RESPONSE_DN                    | 21.9 (0.01*)     | 53.0 (4.9E-06*)  | 0.5 (0.9)    | 2.6 (0.5)        | 5.3 (0.3)        | 6.1 (0.2)    | 3.1 (0.5)       | 0.5 (0.9)       | 0.1 (1.0)    | 1.9 (0.6)       | 1.0 (0.8)       | 0.1 (1.0)    | 2.6 (0.5)        |  |
| UV_RESPONSE_UP                    | 21.8 (0.01*)     | 5.9 (0.2)        | 5.9 (0.3)    | 0.9 (0.8)        | 0.5 (0.9)        | 0.1 (1.0)    | 0.7 (0.9)       | 1.9 (0.6)       | 7.5 (0.2)    | 0.1 (1.0)       | 1.9 (0.6)       | 2.9 (0.5)    | 3.6 (0.4)        |  |
| WNT_BETA_CATENIN_SIGNALING        | 3.3 (0.5)        | 4.3 (0.4)        | 1.6 (0.7)    | 13.9 (0.04*)     | 10.4 (0.09*)     | 0.4 (0.9)    | 0.5 (0.9)       | 1.7 (0.7)       | 0.1 (1.0)    | 3.0 (0.5)       | 33.5 (0.01*)    | 2.3 (0.6)    | 15.1 (0.03*)     |  |
| XENOBIOTIC_METABOLISM             | 2.6 (0.5)        | 0.6 (0.9)        | 3.8 (0.4)    | 10.7 (0.08*)     | 9.9 (0.1*)       | 0.1 (1.0)    | 3.1 (0.5)       | 8.6 (0.1)       | 5.4 (0.3)    | 2.3 (0.6)       | 1.9 (0.6)       | 7.9 (0.2)    | 14.0 (0.04*)     |  |

**Figure S4 HALLMARK pathway analysis of the RNA-seq results obtained following treatment of the indicated gastric cell lines with ATRA**

Exponentially growing cultures of the indicated cell lines were exposed to ATRA (1.0  $\mu$ M) for 48 hours. At the end of the treatment cells were subjected to RNA-seq analysis (Supplementary Table S3). The data obtained were subjected to pathway analysis using the HALLMARK data set. The numbers shown indicate the Score values obtained. The FDR (False-Discovery-Rate) values are indicated in parenthesis. When the FDR values are <0.1, they are considered to be statistically significant and they are marked in red with an asterisk. When the statistically significant pathways are up-regulated they are contained in a pink box. By contrast, the down-regulated pathways are contained in light blue box. The most relevant up- (red) or down-regulated (blue) pathways are contained in a yellow box.

| KEGG Metabolism                                          | High Sensitivity |                |             |                |                |                |                |                |             |                | Low Sensitivity |                |                |  |  |  |
|----------------------------------------------------------|------------------|----------------|-------------|----------------|----------------|----------------|----------------|----------------|-------------|----------------|-----------------|----------------|----------------|--|--|--|
|                                                          | GCV              | HGC27          | GSU         | RERF-GC-1B     | KATO-III       | M95            | LMSU           | MKN45          | GSS         | AGS            | NCA-N87         | HuG1-N         | OCUM-1         |  |  |  |
| ALANINE ASPARTATE AND GLUTAMATE METABOLISM               | 0.3(0.9)         | 5.6(0.3)       | 4.0(0.4)    | 0.1(1.0)       | 0.7(0.8)       | 0.3(0.9)       | 2.3(0.6)       | 0.1(1.0)       | 1.2(0.9)    | 2.1(0.6)       | 3.4(0.5)        | 0.4(0.9)       | 3.2(0.5)       |  |  |  |
| ALPHA LINOLENIC ACID METABOLISM                          | 0.8(0.8)         | 0.7(0.9)       | 1.6(0.7)    | 4.3(0.4)       | 0.2(0.9)       | 0.3(0.9)       | 1.8(0.7)       | 0.8(0.8)       | 2.9(0.5)    | 0.2(1.0)       | 0.1(1.0)        | 0.4(0.9)       | 7.3(0.2)       |  |  |  |
| AMINO SUGAR AND NUCLEOTIDE SUGAR METABOLISM              | 3.6(0.4)         | 0.6(0.9)       | 0.7(0.8)    | 1.6(0.7)       | 16.9(0.02*)    | 0.1(1.0)       | 11.7(0.07*)    | 4.5(0.4)       | 0.5(0.9)    | 3.0(0.5)       | 1.7(0.7)        | 1.0(0.8)       | 9.1(0.1)       |  |  |  |
| ARACHIDONIC ACID METABOLISM                              | 0.6(0.9)         | 1.2(0.8)       | 5.2(0.3)    | 1.6(0.7)       | 1.8(0.7)       | 0.1(1.0)       | 11.0(0.08*)    | 0.1(1.0)       | 3.7(0.4)    | 1.4(0.7)       | 8.7(0.1)        | 2.6(0.9)       | 0.8(0.8)       |  |  |  |
| ARGININE AND PROLINE METABOLISM                          | 0.1(1.0)         | 12.3(0.06*)    | 1.0(0.8)    | 4.3(0.4)       | 5.1(0.3)       | 0.1(1.0)       | 10.0(1.0)      | 0.4(0.9)       | 2.6(0.5)    | 1.3(0.7)       | 1.5(0.7)        | 0.3(0.9)       | 13.5(0.04*)    |  |  |  |
| ASCORBATE AND ALDARATE METABOLISM                        | 5.2(0.3)         | 6.7(0.2)       | 1.5(0.7)    | 4.6(0.3)       | 0.2(0.9)       | 27.6(1.7E-03*) | 1.0(0.8)       | 12.6(0.06*)    | 0.2(0.9)    | 0.1(1.0)       | 4.5(0.4)        | 9.8(0.1)       | 29.7(1.1E-03*) |  |  |  |
| BETA ALANINE METABOLISM                                  | 2.7(0.5)         | 5.9(0.3)       | 1.8(0.7)    | 0.4(0.9)       | 0.3(0.9)       | 0.1(1.0)       | 0.5(0.9)       | 4.7(0.3)       | 0.3(0.9)    | 1.4(0.7)       | 0.4(0.9)        | 3.1(0.5)       | 6.0(0.2)       |  |  |  |
| BIOSYNTHESIS OF UNSATURATED FATTY ACIDS                  | 0.1(1.0)         | 0.1(1.0)       | 0.4(0.9)    | 4.3(0.4)       | 0.3(0.9)       | 0.1(1.0)       | 0.5(0.9)       | 1.6(0.7)       | 2.3(0.6)    | 0.2(1.0)       | 1.8(0.7)        | 0.4(0.9)       | 15.9(0.02*)    |  |  |  |
| BUTANOATE METABOLISM                                     | 2.7(0.5)         | 17.7(0.02*)    | 0.2(1.0)    | 5.1(0.3)       | 1.0(0.8)       | 6.0(0.3)       | 5.8(0.3)       | 25.9(1.7E-03*) | 0.2(0.9)    | 12.9(0.06*)    | 4.5(0.4)        | 2.8(0.5)       | 23.7(1.1E-03*) |  |  |  |
| CITRATE CYCLE OR CYCLE                                   | 0.8(0.8)         | 41.9(6.0E-05*) | 2.4(0.6)    | 5.9(0.2)       | 2.1(0.9)       | 8.3(0.1)       | 3.3(0.5)       | 7.4(0.2)       | 3.7(0.4)    | 0.1(1.0)       | 1.1(1.0)        | 1.7(0.7)       | 0.4(0.9)       |  |  |  |
| CYSTEINE AND METHIONINE METABOLISM                       | 0.3(0.9)         | 11.4(0.07*)    | 1.5(0.7)    | 0.9(0.8)       | 6.9(0.2)       | 0.3(0.9)       | 0.6(0.9)       | 0.6(0.9)       | 1.6(0.7)    | 5.2(0.3)       | 2.8(0.5)        | 0.4(0.9)       | 7.2(0.2)       |  |  |  |
| DRUG METABOLISM CYTOCHROME P450                          | 0.1(1.0)         | 0.1(1.0)       | 1.5(0.7)    | 1.1(0.8)       | 16.9(0.02*)    | 28.9(1.3E-03*) | 0.3(0.9)       | 53.0(5.0E-06*) | 0.1(1.0)    | 3.0(0.5)       | 8.4(0.1)        | 36.0(2.0E-04*) | 23.6(4.3E-03*) |  |  |  |
| DRUG METABOLISM OTHER ENZYMES                            | 0.3(0.9)         | 0.8(0.8)       | 1.9(0.6)    | 1.0(0.8)       | 1.9(0.6)       | 5.8(0.3)       | 0.1(1.0)       | 4.1(0.4)       | 2.6(0.6)    | 0.1(1.0)       | 3.7(0.4)        | 4.7(0.3)       | 23.6(4.3E-03*) |  |  |  |
| ENDOCYTOSIS                                              | 1.8(0.6)         | 13.7(0.04*)    | 5.9(0.3)    | 0.8(0.8)       | 7.3(0.2)       | 0.1(1.0)       | 14.0(7)        | 0.6(0.9)       | 1.7(0.7)    | 0.9(0.8)       | 1.7(0.7)        | 0.8(0.8)       | 0.8(0.8)       |  |  |  |
| ETHER LIPID METABOLISM                                   | 4.2(0.4)         | 0.7(0.9)       | 2.8(0.5)    | 0.4(0.9)       | 0.4(0.9)       | 0.3(0.9)       | 1.4(0.7)       | 5.3(0.3)       | 1.6(0.7)    | 1.0(0.8)       | 0.9(0.8)        | 0.4(0.9)       | 1.0(0.8)       |  |  |  |
| FATTY ACID METABOLISM                                    | 1.3(0.7)         | 13.7(0.04*)    | 9.8(0.1)    | 4.3(0.4)       | 5.6(0.3)       | 17.9(0.02*)    | 0.5(0.9)       | 74.3(3.7E-08*) | 3.7(0.4)    | 0.1(1.0)       | 1.4(0.7)        | 3.9(0.4)       | 51.3(7.9E-06*) |  |  |  |
| FOLATE BIOSYNTHESIS                                      | 6.7(0.2)         | 3.4(0.5)       | 2.1(0.9)    | 1.9(0.6)       | 0.2(0.9)       | 0.1(1.0)       | 5.7(0.3)       | 1.8(0.7)       | 5.5(0.3)    | 0.1(1.0)       | 1.3(0.7)        | 3.0(0.5)       | 9.8(0.1)       |  |  |  |
| FRUCTOSE AND MANNOSE METABOLISM                          | 1.9(0.6)         | 16.1(0.02*)    | 0.5(0.9)    | 0.1(1.0)       | 0.3(0.9)       | 0.5(0.9)       | 8.1(0.2)       | 0.9(0.8)       | 2.9(0.5)    | 1.6(0.7)       | 0.1(1.0)        | 0.4(0.9)       | 3.8(0.1)       |  |  |  |
| GALACTOSE METABOLISM                                     | 3.9(0.4)         | 1.3(0.7)       | 1.0(0.8)    | 6.4(0.2)       | 9.6(0.1)       | 0.3(0.9)       | 6.3(0.2)       | 4.1(0.4)       | 10.5(0.05*) | 1.6(0.7)       | 2.9(0.5)        | 0.9(0.8)       | 3.8(0.4)       |  |  |  |
| GLUTATHIONE METABOLISM                                   | 1.9(0.6)         | 1.9(0.7)       | 4.9(0.3)    | 6.4(0.2)       | 6.5(0.2)       | 0.1(1.0)       | 2.3(0.6)       | 11.0(0.08*)    | 0.2(1.0)    | 0.3(0.9)       | 3.7(0.4)        | 21.0(7.9E-03*) | 9.2(0.1)       |  |  |  |
| GLYCEROLIPID METABOLISM                                  | 2.7(0.5)         | 2.3(0.6)       | 1.8(0.7)    | 5.1(0.3)       | 0.9(0.8)       | 0.6(0.9)       | 14.0(7)        | 11.0(0.08*)    | 3.7(0.4)    | 1.1(0.8)       | 2.4(0.6)        | 0.9(0.8)       | 20.9(8.2E-03*) |  |  |  |
| GLYCEROPHOSPHOLIPID METABOLISM                           | 19.9(0.01*)      | 1.2(0.8)       | 0.8(0.8)    | 4.0(0.4)       | 7.3(0.2)       | 2.4(0.6)       | 4.9(0.3)       | 18.8(0.01*)    | 13.1(0.05*) | 0.1(1.0)       | 5.7(0.3)        | 2.4(0.6)       | 9.3(0.1)       |  |  |  |
| GLYCINE SERINE AND THREONINE METABOLISM                  | 16.2(0.02*)      | 7.3(0.2)       | 3.3(0.5)    | 0.5(0.9)       | 2.1(0.9)       | 0.8(0.8)       | 2.7(0.5)       | 0.1(1.0)       | 0.5(0.9)    | 0.1(1.0)       | 0.3(0.9)        | 0.3(0.9)       | 10.0(0.01*)    |  |  |  |
| GLYCOLYSIS GLUCONEOGENESIS                               | 2.7(0.5)         | 17.9(0.02*)    | 5.6(0.3)    | 1.0(0.8)       | 0.9(0.8)       | 0.3(0.9)       | 7.1(0.2)       | 16.3(0.03*)    | 4.9(0.3)    | 1.0(0.8)       | 1.7(0.7)        | 3.9(0.4)       | 35.7(3.0E-04*) |  |  |  |
| GLYCOSAMINOGLYCAN BIOSYNTHESIS CHONDROITIN SULFATE       | 0.3(0.9)         | 8.9(0.1)       | 1.2(0.8)    | 2.2(0.6)       | 0.2(0.9)       | 0.1(1.0)       | 0.5(0.9)       | 0.1(1.0)       | 4.9(0.3)    | 2.0(0.6)       | 1.8(0.7)        | 0.8(0.8)       | 17.4(0.02*)    |  |  |  |
| GLYCOSAMINOGLYCAN BIOSYNTHESIS HEPARAN SULFATE           | 2.6(0.5)         | 3.3(0.5)       | 2.4(0.6)    | 1.1(0.8)       | 0.1(1.0)       | 0.1(1.0)       | 0.9(0.8)       | 0.3(0.9)       | 0.4(0.9)    | 3.0(0.5)       | 0.3(0.9)        | 2.0(0.6)       | 0.3(0.9)       |  |  |  |
| GLYCOSAMINOGLYCAN BIOSYNTHESIS KERATAN SULFATE           | 1.4(0.7)         | 1.5(0.7)       | 2.6(0.5)    | 5.5(0.3)       | 8.8(0.1)       | 0.1(1.0)       | 0.2(0.9)       | 1.8(0.7)       | 3.3(0.5)    | 1.2(0.8)       | 9.0(0.1)        | 1.0(0.8)       | 6.7(0.2)       |  |  |  |
| GLYCOSPHINGOLIPID BIOSYNTHESIS GANGLIO SERIES            | 0.2(1.0)         | 2.0(0.6)       | 0.1(1.0)    | 4.3(0.4)       | 0.1(1.0)       | 0.1(1.0)       | 0.2(1.0)       | 1.8(0.7)       | 0.8(0.8)    | 1.0(0.8)       | 5.0(0.3)        | 1.3(0.7)       | 0.1(1.0)       |  |  |  |
| GLYCOSPHINGOLIPID BIOSYNTHESIS HE SISO GLOBO SERIES      | 0.8(0.8)         | 0.9(0.8)       | 5.6(0.3)    | 27.8(1.7E-03*) | 0.1(1.0)       | 0.1(1.0)       | 0.5(0.9)       | 2.1(0.6)       | 2.7(0.5)    | 0.2(1.0)       | 1.5(0.7)        | 1.2(0.8)       | 0.4(0.9)       |  |  |  |
| GLYCOSPHINGOLIPID BIOSYNTHESIS LACTO AND NEOLACTO SERIES | 0.8(0.8)         | 0.4(0.9)       | 16.1(0.02*) | 10.3(0.09*)    | 1.9(0.6)       | 0.5(0.9)       | 0.7(0.8)       | 0.1(1.0)       | 2.0(0.6)    | 0.1(1.0)       | 4.0(0.4)        | 0.5(0.9)       | 1.1(0.8)       |  |  |  |
| GLYCOSYLPHOSPHATIDYLINO SITOLO ANCHOR BIOSYNTHESIS       | 1.7(0.7)         | 3.6(0.4)       | 2.6(0.5)    | 4.3(0.4)       | 0.3(0.9)       | 0.1(1.0)       | 3.6(0.4)       | 0.4(0.9)       | 3.3(0.5)    | 0.1(1.0)       | 1.2(0.7)        | 0.1(1.0)       | 1.3(0.7)       |  |  |  |
| KEGG GLYOXYLATE AND DICARBONYL METABOLISM                | 0.1(1.0)         | 14.7(0.03*)    | 0.3(0.9)    | 0.5(0.9)       | 5.0(3)         | 2.9(0.5)       | 3.6(0.4)       | 0.2(1.0)       | 3.1(0.5)    | 1.0(0.8)       | 0.1(1.0)        | 0.1(1.0)       | 5.5(0.3)       |  |  |  |
| HISTIDINE METABOLISM                                     | 1.8(0.7)         | 6.0(0.2)       | 2.3(0.6)    | 0.4(0.9)       | 0.3(0.9)       | 0.5(0.9)       | 0.1(1.0)       | 1.4(0.7)       | 1.9(0.6)    | 0.1(1.0)       | 2.7(0.5)        | 1.0(0.8)       | 8.6(0.1)       |  |  |  |
| INDO SITOLO PHOSPHATE METABOLISM                         | 1.3(0.7)         | 4.7(0.3)       | 1.8(0.7)    | 8.6(0.1)       | 2.1(0.6)       | 0.3(0.9)       | 2.3(0.6)       | 0.1(1.0)       | 3.3(0.5)    | 0.6(0.9)       | 1.7(0.7)        | 2.6(0.5)       | 0.1(1.0)       |  |  |  |
| LIPOIC ACID METABOLISM                                   | 1.3(0.7)         | 3.6(0.4)       | 9.8(0.1)    | 3.9(0.4)       | 0.2(0.9)       | 0.3(0.9)       | 2.3(0.6)       | 1.6(0.7)       | 3.2(0.5)    | 1.1(0.8)       | 1.8(0.7)        | 0.3(0.9)       | 3.8(0.4)       |  |  |  |
| LYSINE DEGRADATION                                       | 8.8(0.1)         | 14.3(0.04*)    | 1.2(0.8)    | 21.5(7.0E-03*) | 7.3(0.2)       | 0.6(0.9)       | 5.2(0.3)       | 0.1(1.0)       | 1.5(0.7)    | 2.1(0.6)       | 2.1(0.6)        | 1.0(0.8)       | 1.8(0.7)       |  |  |  |
| LYSOSOME                                                 | 3.0(0.5)         | 25.2(3.0E-03*) | 0.7(0.8)    | 18.0(1.6E-02*) | 16.7(0.01*)    | 0.5(0.9)       | 0.2(1.0)       | 3.2(0.5)       | 0.3(0.9)    | 52.8(5.2E-05*) | 11.0(0.08)      | 4.2(0.4)       | 0.2(0.9)       |  |  |  |
| METABOLISM OF XENOBIOTICS BY CYTOCHROME P450             | 0.8(0.8)         | 0.7(0.8)       | 1.2(0.8)    | 0.4(0.9)       | 26.8(2.1E-03*) | 54.0(4.0E-06*) | 1.4(0.7)       | 46.1(2.5E-05*) | 0.8(0.8)    | 3.0(0.5)       | 9.0(0.1)        | 48.8(1.0E-05*) | 28.8(1.3E-03*) |  |  |  |
| N-GLYCAN BIOSYNTHESIS                                    | 18.4(0.01*)      | 2.9(0.5)       | 0.8(0.8)    | 0.6(0.9)       | 0.8(0.8)       | 0.5(0.9)       | 6.1(0.2)       | 0.1(1.0)       | 0.2(1.0)    | 3.0(0.5)       | 1.3(0.7)        | 0.7(0.8)       | 1.7(0.7)       |  |  |  |
| NICOTINATE AND NICOTINAMIDE METABOLISM                   | 1.3(0.7)         | 1.2(0.8)       | 0.7(0.8)    | 0.7(0.8)       | 0.4(0.9)       | 0.5(0.9)       | 3.3(0.5)       | 0.1(1.0)       | 2.9(0.5)    | 2.6(0.5)       | 1.2(0.8)        | 0.3(0.9)       | 4.1(0.4)       |  |  |  |
| NITROGEN METABOLISM                                      | 0.2(1.0)         | 12.5(0.06*)    | 1.5(0.7)    | 0.9(0.8)       | 1.2(0.8)       | 0.1(1.0)       | 2.3(0.6)       | 0.6(0.9)       | 1.6(0.7)    | 0.2(1.0)       | 1.3(0.7)        | 3.1(0.5)       | 7.3(0.2)       |  |  |  |
| OTHER GLYCAN DEGRADATION                                 | 0.2(1.0)         | 6.6(0.2)       | 2.0(0.6)    | 2.9(0.5)       | 2.4(0.6)       | 0.1(1.0)       | 0.3(0.9)       | 1.6(0.7)       | 1.6(0.7)    | 15.7(2.7E-02*) | 3.8(0.4)        | 1.2(0.8)       | 8.1(0.2)       |  |  |  |
| OXIDATIVE PHOSPHORYLATION                                | 26.6(2.2E-03*)   | 37.5(1.8E-04*) | 16(0.7)     | 5.1(0.3)       | 3.5(0.5)       | 0.1(1.0)       | 5.7(0.3)       | 29.8(1.0E-03*) | 2.9(0.5)    | 1.0(0.8)       | 0.2(0.9)        | 3.9(0.4)       | 51.3(7.9E-06*) |  |  |  |
| PANTOTHENATE AND COA BIOSYNTHESIS                        | 0.5(0.9)         | 2.4(0.6)       | 1.6(0.7)    | 0.3(0.9)       | 1.5(0.02*)     | 0.5(0.9)       | 0.2(0.9)       | 4.0(0.9)       | 0.5(0.9)    | 0.1(1.0)       | 1.4(0.7)        | 1.0(0.8)       | 1.0(0.8)       |  |  |  |
| PENTOSE AND GLUCURONATE INTERCONVERSIONS                 | 4.2(0.4)         | 0.9(0.8)       | 1.8(0.7)    | 0.6(0.9)       | 0.8(0.8)       | 6.7(0.2)       | 0.2(1.0)       | 8.8(0.1)       | 0.6(0.9)    | 1.9(0.7)       | 4.5(0.4)        | 12.6(0.05*)    | 22.6(5.4E-03*) |  |  |  |
| PENTOSE PHOSPHATE PATHWAY                                | 4.1(0.4)         | 5.5(0.3)       | 1.6(0.7)    | 0.4(0.9)       | 0.1(1.0)       | 0.3(0.9)       | 1.8(0.7)       | 0.5(0.9)       | 10.6(0.05*) | 1.0(0.8)       | 2.0(0.6)        | 19.3(0.01*)    | 16.4(0.02*)    |  |  |  |
| PEROXISOME                                               | 3.9(0.4)         | 4.5(0.3)       | 9.1(0.1)    | 0.3(0.9)       | 9.7(0.1)       | 0.5(0.9)       | 0.1(1.0)       | 44.7(3.4E-05*) | 2.2(0.6)    | 0.2(1.0)       | 2.6(0.5)        | 7.8(0.2)       | 16.7(0.02*)    |  |  |  |
| PHENYLALANINE METABOLISM                                 | 1.3(0.7)         | 5.6(0.3)       | 9.1(0.1)    | 1.7(0.7)       | 3.3(0.5)       | 0.5(0.9)       | 2.3(0.6)       | 0.3(0.9)       | 1.6(0.7)    | 1.0(0.8)       | 2.6(0.5)        | 0.4(0.9)       | 4.2(0.4)       |  |  |  |
| PORPHYRIN AND HEMOPROTEIN METABOLISM                     | 0.1(1.0)         | 5.6(0.3)       | 5.9(0.3)    | 0.1(1.0)       | 0.8(0.8)       | 16.6(0.02*)    | 3.3(0.5)       | 13.2(0.05*)    | 0.1(1.0)    | 0.1(1.0)       | 1.8(0.7)        | 15.0(0.03*)    | 35.3(3.0E-04*) |  |  |  |
| PRIMARY BILE ACID BIOSYNTHESIS                           | 2.0(0.6)         | 1.2(0.8)       | 2.1(0.9)    | 5.1(0.3)       | 5.1(0.3)       | 0.1(1.0)       | 3.8(0.4)       | 1.6(0.7)       | 2.3(0.6)    | 3.0(0.5)       | 0.2(1.0)        | 1.3(0.7)       | 5.6(0.3)       |  |  |  |
| PROPANOATE METABOLISM                                    | 10.2(0.05*)      | 20.7(8.4E-03*) | 0.3(0.9)    | 4.9(0.3)       | 2.1(0.6)       | 0.3(0.9)       | 6.3(0.2)       | 3.8(0.4)       | 1.9(0.6)    | 1.4(0.7)       | 3.6(0.4)        | 3.1(0.5)       | 22.6(5.4E-03*) |  |  |  |
| PURINE METABOLISM                                        | 23.7(4.9E-03*)   | 5.6(0.3)       | 1.6(0.7)    | 1.8(0.7)       | 0.9(0.8)       | 0.5(0.9)       | 3.6(0.4)       | 0.1(1.0)       | 3.6(0.4)    | 3.5(0.4)       | 1.5(0.7)        | 1.0(0.8)       | 9.2(0.1)       |  |  |  |
| PYRIMIDINE METABOLISM                                    | 30.3(0.0E-04*)   | 5.6(0.3)       | 1.0(0.8)    | 6.3(0.2)       | 4.4(0.4)       | 0.5(0.9)       | 7.1(0.2)       | 0.1(1.0)       | 3.7(0.4)    | 2.7(0.5)       | 0.2(1.0)        | 2.6(0.5)       | 13.8(0.04*)    |  |  |  |
| PYRUVATE METABOLISM                                      | 4.6(0.3)         | 37.5(1.8E-04*) | 2.3(0.6)    | 20.1(9.7E-03*) | 6.2(0.2)       | 0.6(0.9)       | 9.9(0.1)       | 4.5(0.4)       | 5.8(0.3)    | 0.2(1.0)       | 1.4(0.7)        | 0.1(1.0)       | 34.0(4.0E-04*) |  |  |  |
| RETINOL METABOLISM                                       | 3.2(0.5)         | 25.1(3.0E-03*) | 2.3(0.6)    | 23.1(4.9E-03*) | 18.7(0.01*)    | 48.4(1.0E-05*) | 34.1(4.0E-04*) | 55.5(2.8E-06*) | 1.6(0.7)    | 0.1(1.0)       | 4.5(0.4)        | 36.0(2.0E-04*) | 34.0(4.0E-04*) |  |  |  |
| RIBOFLAVIN METABOLISM                                    | 0.1(1.0)         | 1.2(0.8)       | 0.6(0.9)    | 1.0(0.8)       | 2.1(0.6)       | 0.1(1.0)       | 0.1(1.0)       | 2.3(0.6)       | 0.5(0.9)    | 0.1(1.0)       | 3.4(0.5)        | 0.7(0.8)       | 3.8(0.4)       |  |  |  |
| SELENOAMINO ACID METABOLISM                              | 0.1(1.0)         | 1.2(0.8)       | 1.5(0.7)    | 0.3(0.9)       | 1.6(0.7)       | 0.3(0.9)       | 0.1(1.0)       | 0.1(1.0)       | 2.313062152 | 3.0(0.5)       | 0.2(0.9)        | 0.8(0.8)       | 8.3(0.1)       |  |  |  |
| SPHINGOLIPID METABOLISM                                  | 4.1(0.4)         | 8.3(0.1)       | 8.0(2)      | 4.3(0.4)       | 0.5(0.9)       | 0.1(1.0)       | 0.2(0.9)       | 0.1(1.0)       | 2.9(0.5)    | 5.2(0.3)       | 1.8(0.6)        | 0.3(0.9)       | 0.3(0.9)       |  |  |  |
| STARCH AND SUCROSE METABOLISM                            | 1.4(0.7)         | 2.3(0.6)       | 2.8(0.5)    | 2.9(0.5)       | 6.6(0.2)       | 14.4(0.04*)    | 1.7(0.7)       | 1.6(0.7)       | 1.7(0.7)    | 1.7(0.7)       | 5.9(0.3)        | 3.9(0.4)       | 5.8(0.3)       |  |  |  |
| STERIOD BIOSYNTHESIS                                     | 2.8(0.5)         | 11.4(0.07*)    | 0.4(0.9)    | 5.0(0.3)       | 3.6(0.4)       | 8.9(0.1)       | 7.5(0.2)       | 22.8(5.2E-03*) | 0.4(0.9)    | 76.0(2.5E-08*) | 8.7(0.1)        | 4.3(0.4)       | 9.5(0.1)       |  |  |  |
| STERIOD HORMONE BIOSYNTHESIS                             | 9.9(0.1)         | 4.7(0.3)       | 2.1(0.9)    | 2.9(0.5)       | 7.3(0.2)       | 54.3(4.0E-06*) | 3.4(0.5)       | 3.3(0.5)       | 0.8(0.8)    | 1.5(0.7)       | 4.3(0.4)</      |                |                |  |  |  |

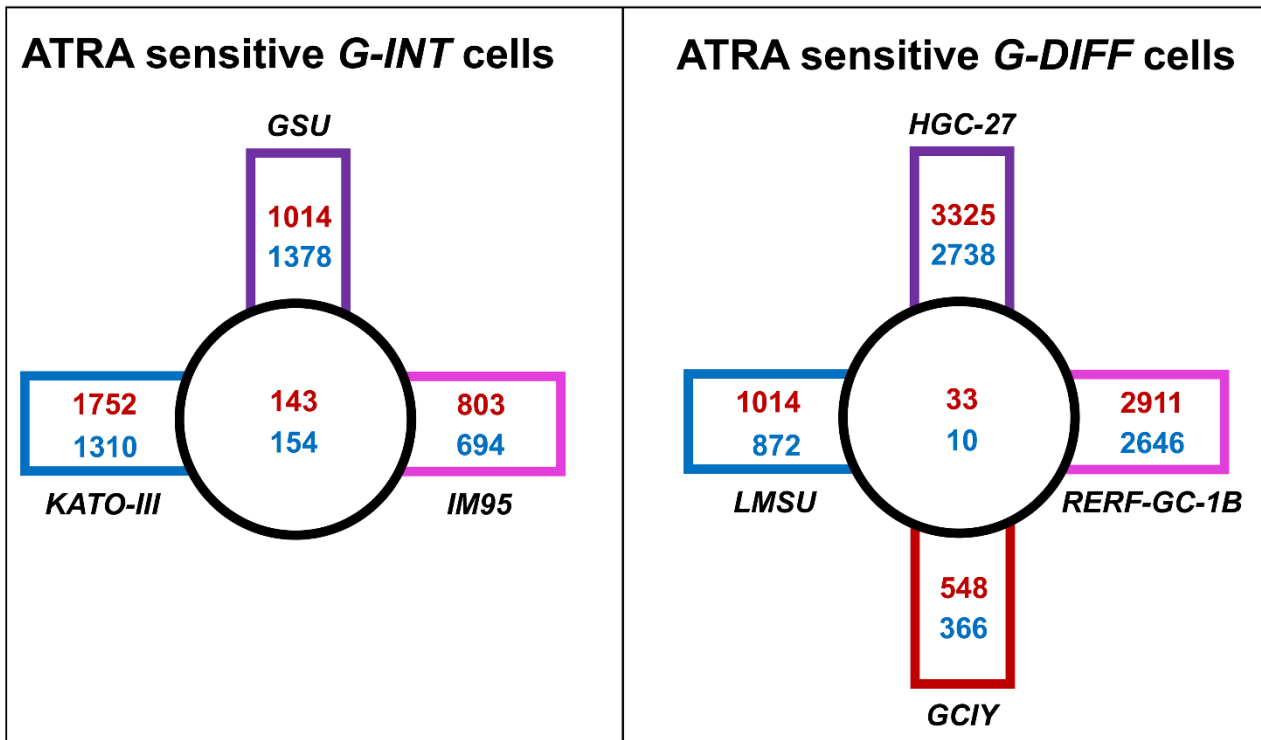

**Figure S6** Number of genes modulated by ATRA in retinoid-sensitive *G-INT* and *G-DIFF* gastric cancer cell-lines

The *G-INT*/retinoid-sensitive *GSU*, *KATO-III* and *IM95* cell-lines as well as the *G-DIFF*/retinoid-sensitive *HGC-27*, *LMSU*, *GCIY* and *RERF-GC-1B* cell-lines were exposed to vehicle (DMSO) or ATRA (1.0  $\mu$ M) for 48 hours. At the end of the treatment, cells were subjected to *RNA-seq* analysis. **Left:** The panel illustrates the number of genes selectively up-regulated (red) or down-regulated (blue) in each *G-INT* cell-line (squares) and commonly up-regulated (red) or down-regulated (blue) in the 3 cell-lines (circle). **Right:** The panel illustrates the number of genes selectively up-regulated (red) or down-regulated (blue) in each *G-DIFF* cell-line (squares) and commonly up-regulated (red) or down-regulated (blue) in the 4 cell-lines (circle).

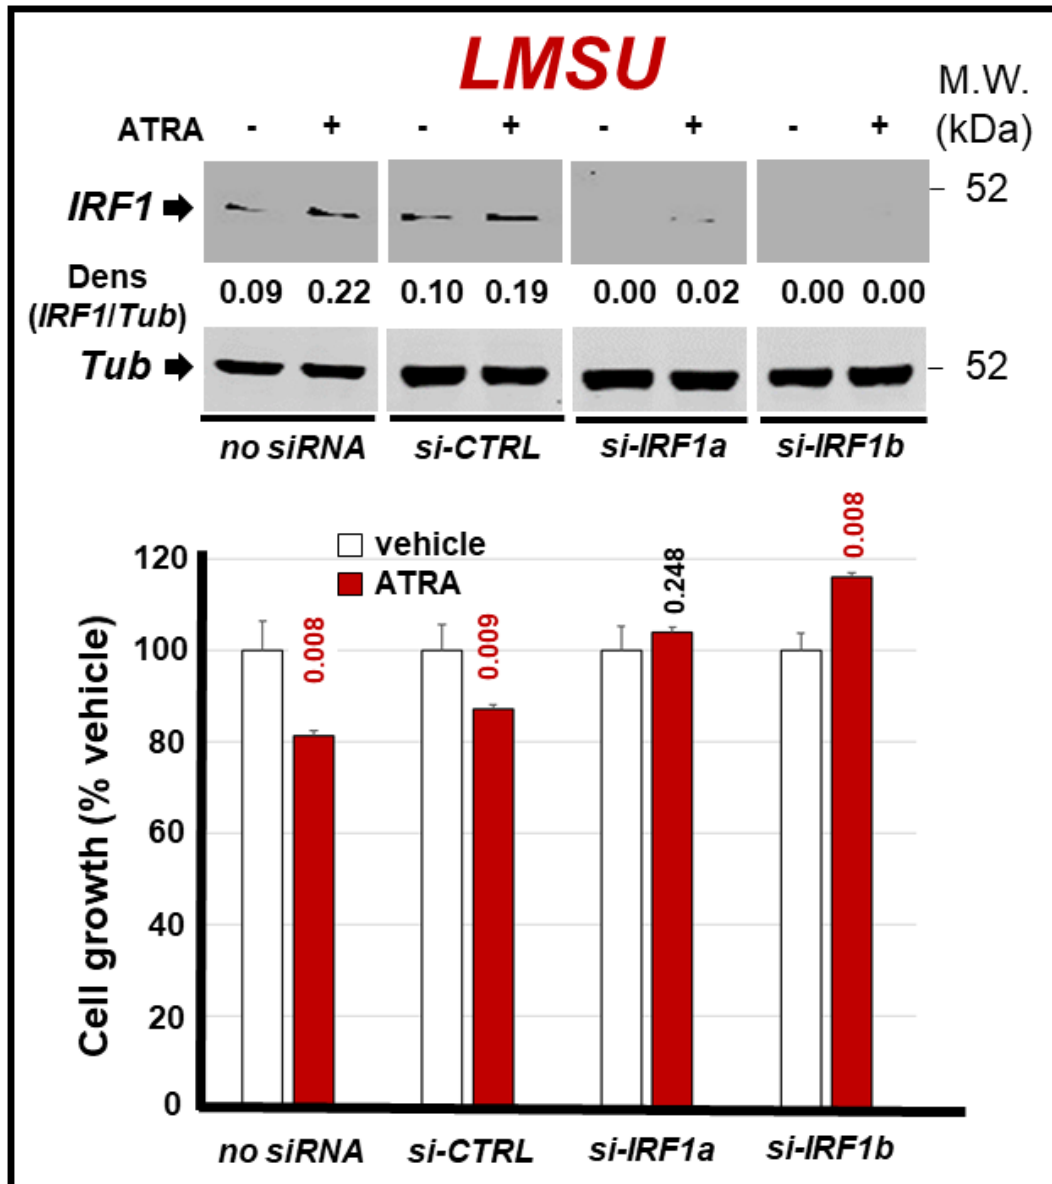

**Figure S7** Effects of ATRA on *IRF1* protein levels and cell-growth in the retinoid-sensitive LMSU cell-line

LMSU cells were transfected with two *IRF1*-targeting (*si-IRF1a*/*si-IRF1b*) and a control siRNA (*si-CTRL*). Twenty-four hours later, cells were treated with vehicle (DMSO) or ATRA (1 $\mu$ M) for 48 hours. **Upper:** Western-blot analysis using anti-*IRF1* and anti-tubulin antibodies: the lanes marked as “no-siRNA” indicate the parental LMSU cells. The values shown underneath the *IRF1* Western blots were obtained following densitometric analysis (Dens) of the *IRF1* and Tubulin (*Tub*) bands and represent the *IRF1/Tub* ratio, as indicated. **Lower:** Cell-growth of the transfected LMSU cells (sulforhodamine-assay): the results are expressed as the Mean $\pm$ SD values of 3 replicate cultures, all the values are normalized for vehicle-treated cells (100%). The p-values (two-tailed Student's t-test) of the comparisons between ATRA-treated and vehicle-treated cells are shown above each red column. The p-values are marked in red if they indicate statistical significance. The figure shows the data obtained in one of the three independent experiments performed, which provided identical results.

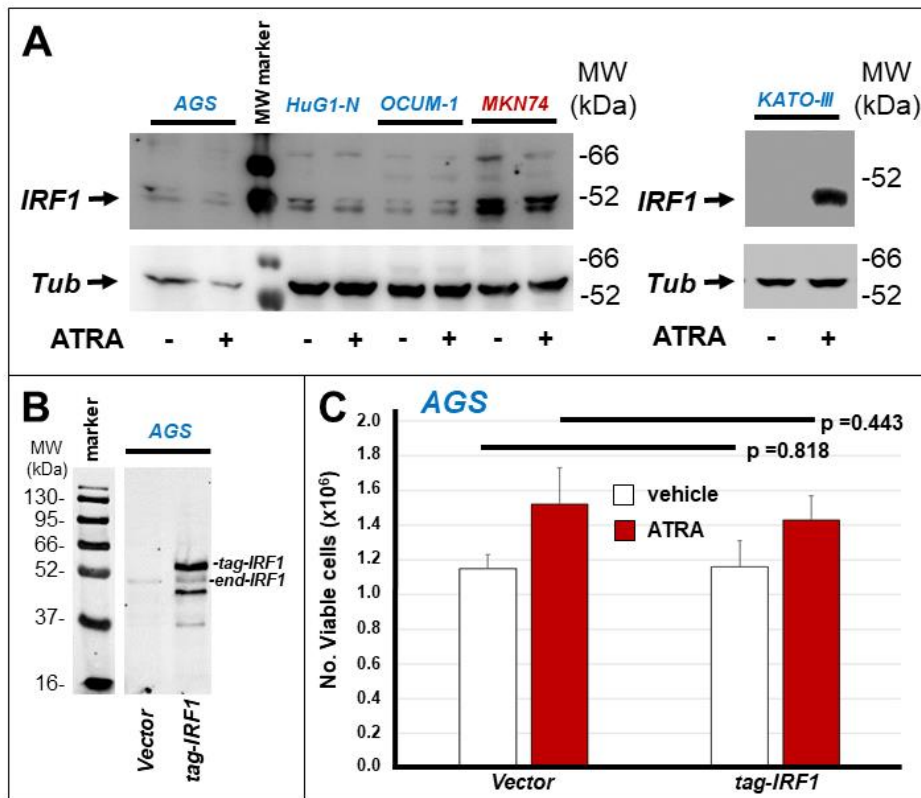

**Figure S8** Effects of ATRA on *IRF1* protein expression in retinoid resistant gastric cancer cells and *IRF1* over-expression in AGS cells

(A) The *G-INT*, *OCUM-1*, *HuG1-N* and AGS cell-lines as well as the *G-DIFF*, *MKN-74* cell-line, which are characterized by a low level of sensitivity to the anti-proliferative effects of ATRA, were exposed to vehicle (DMSO) or ATRA (1.0  $\mu$ M) for 48 hours. At the end of the treatment, cells were subjected to Western blot analysis with specific anti-*IRF1* and anti-tubulin (*Tub*) antibodies. The levels of tubulin in each lane of the gel are shown as a loading control. (B) Retinoid resistant AGS cells were transfected with a commercially available plasmid (myc-DDK-tagged human *IRF1*; Origene) allowing the expression of a tagged and biologically active form of the human *IRF1* transcription factor (*tag-IRF1*) or the corresponding void vector (*Vector*). *IRF1* expressing cells were selected in the presence of G418 (0.4 mg/ml) for 10 days. The Western blot shows the expression levels of the endogenous *IRF1* protein and the over-expressed *tag-IRF1* counterpart. (C) The entire *Vector* and *tag-IRF1* cell populations were plated at the same cell density ( $10^4$  cells/ml) in a 12-wells plate (triplicate cultures). Cells were grown in RPMI medium supplemented with charcoal treated Fetal Bovine Serum (FBS) in the absence of G418 for 2 days. Subsequently cells were exposed to vehicle (DMSO) or 1.0  $\mu$ M for 6 days. The number of viable cells was determined with the use of a Beckman Coulter Counter (Vi-CELL BLU v1.4.2). Each value is the Mean $\pm$ SD of 6 independent cultures. The p-value of the ATRA vs. vehicle comparison is shown above each red column. The comparisons between the results obtained in vehicle treated *Vector* and *tag-IRF1* cells did not provide statistically significant results (p-value = 0.818). Similarly, the comparisons between the results obtained in ATRA treated *Vector* and *tag-IRF1* cells did not provide statistically significant results (p-value = 0.443), as shown in the panel.

ORIGINAL WESTERN BLOTS

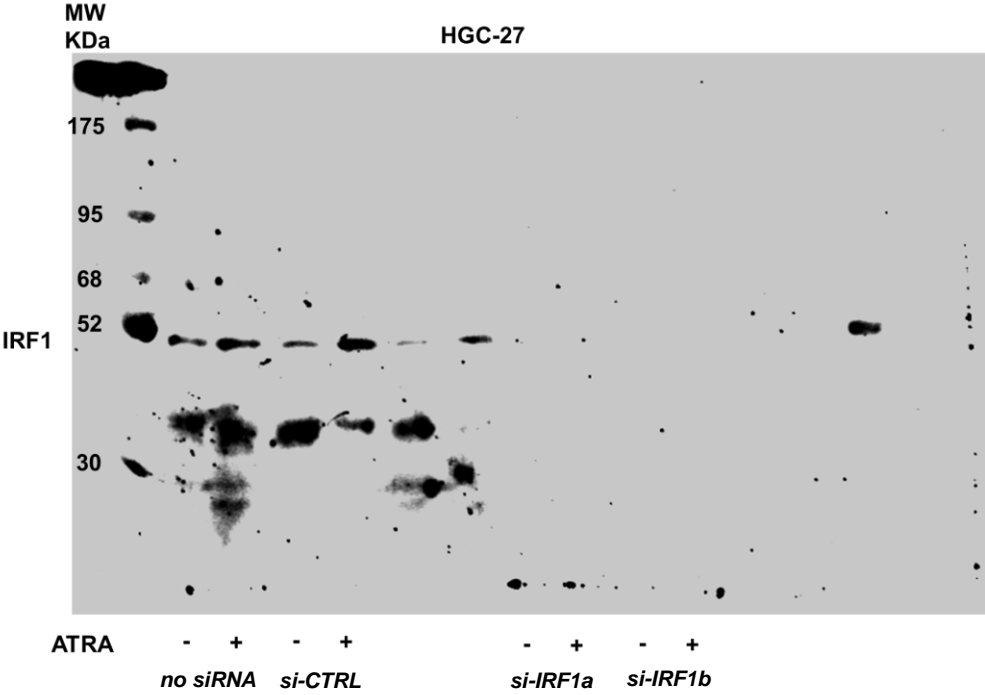

Original Fig 8A

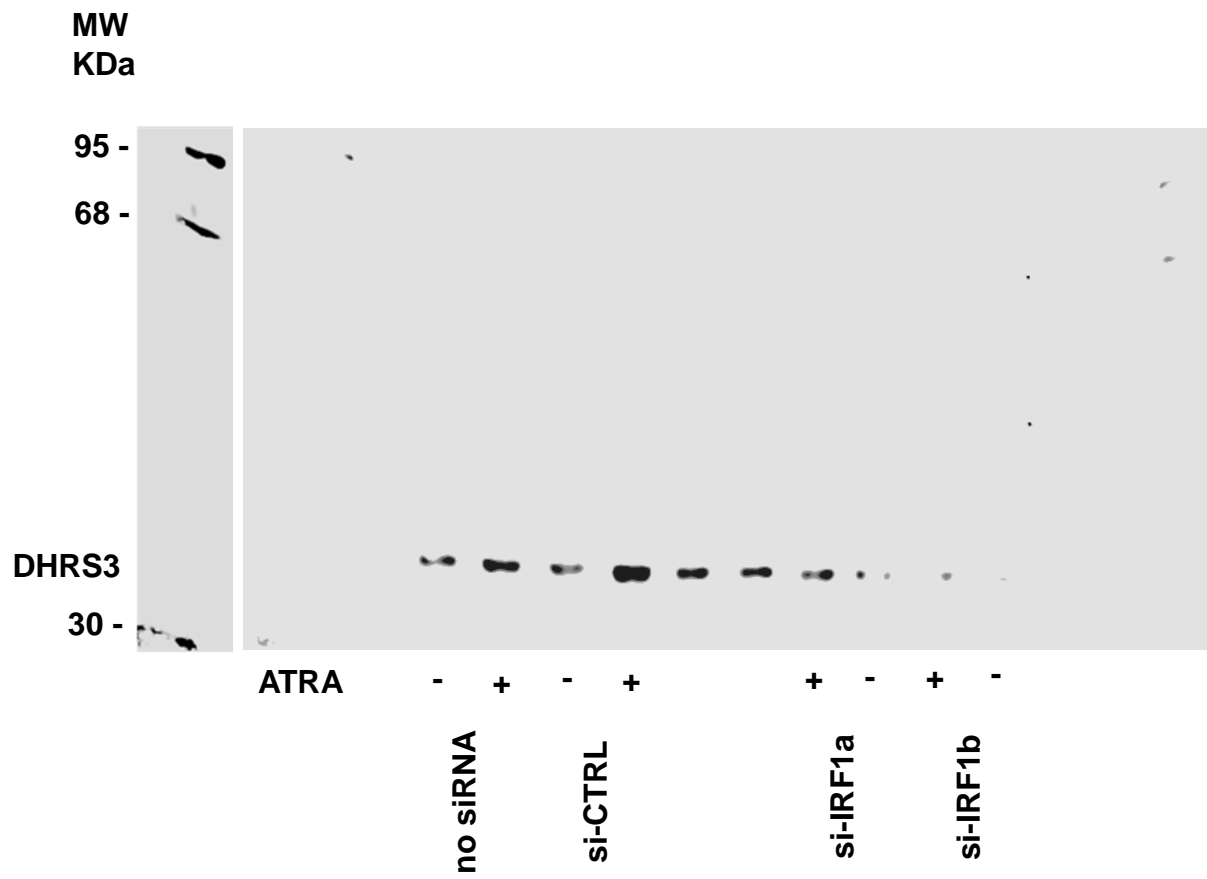

Original Fig 8A

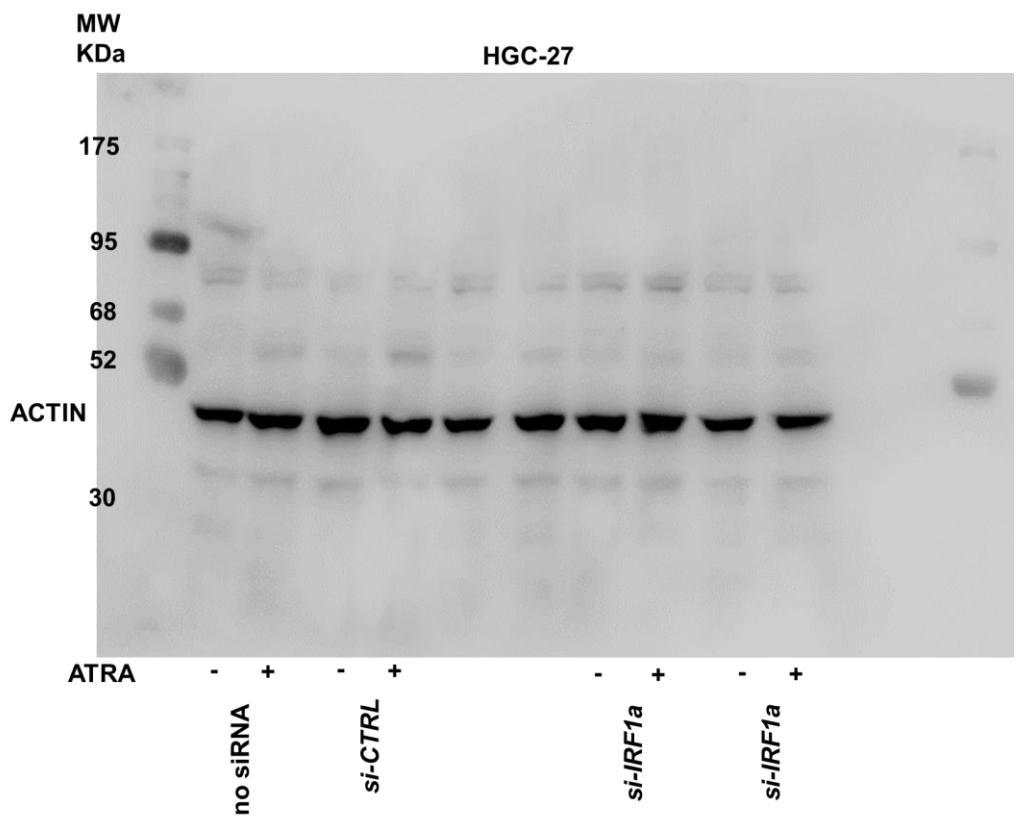

Original **Fig 8A**



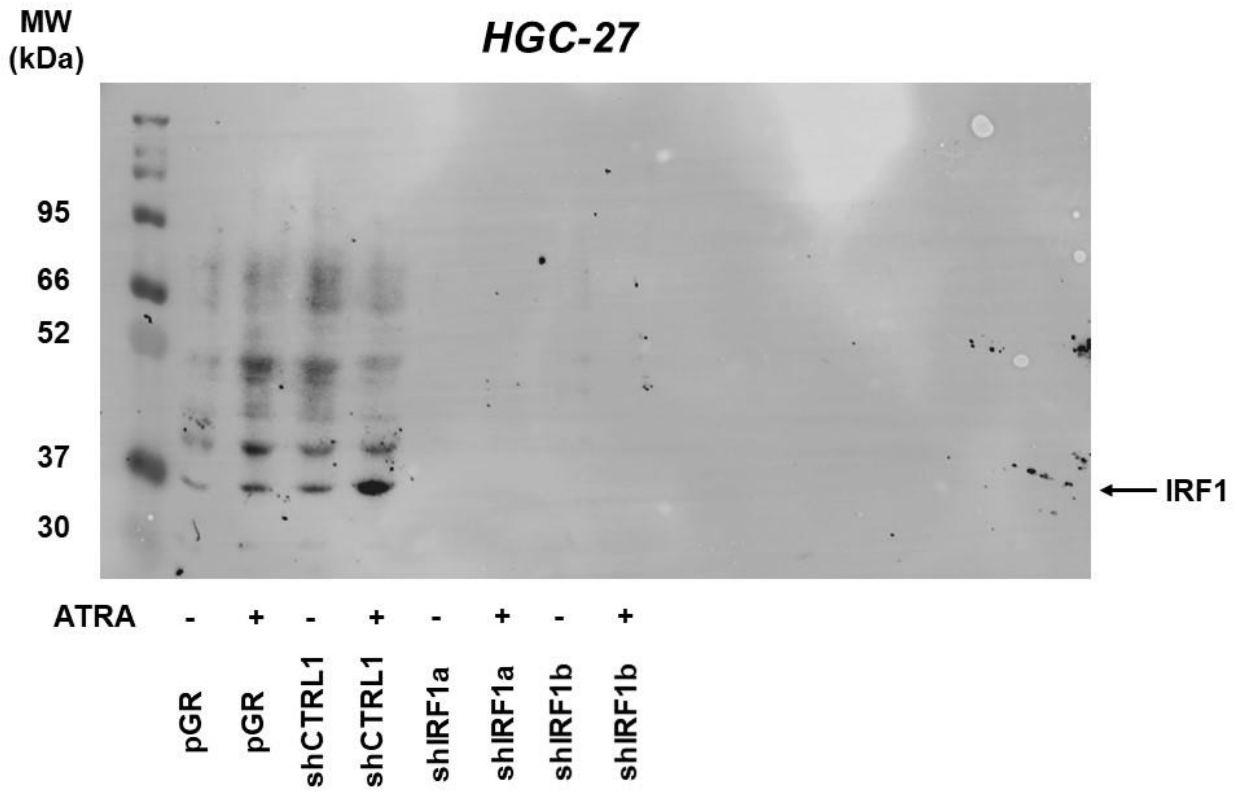

Original Fig 8C

MW  
(kDa)

**HGC-27**

95  
66  
52  
37  
30  
19

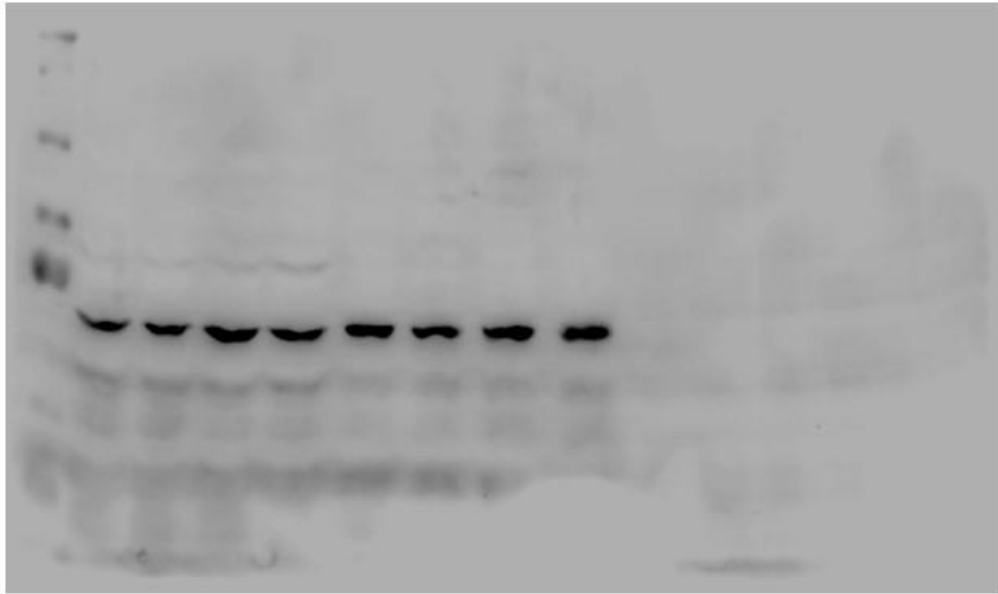

← actin

|      |     |     |         |         |         |         |         |         |
|------|-----|-----|---------|---------|---------|---------|---------|---------|
| ATRA | -   | +   | -       | +       | -       | +       | -       | +       |
|      | pGR | pGR | shCTRL1 | shCTRL1 | shIRF1a | shIRF1a | shIRF1b | shIRF1b |

Original Fig 8C

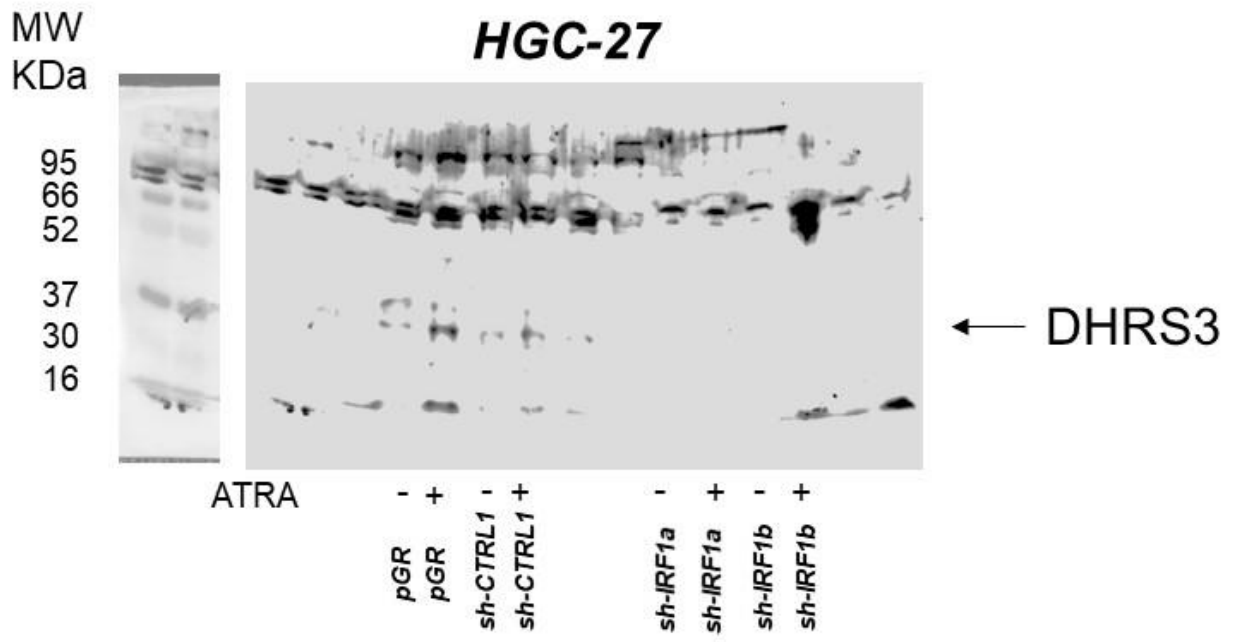

Original Fig 8C

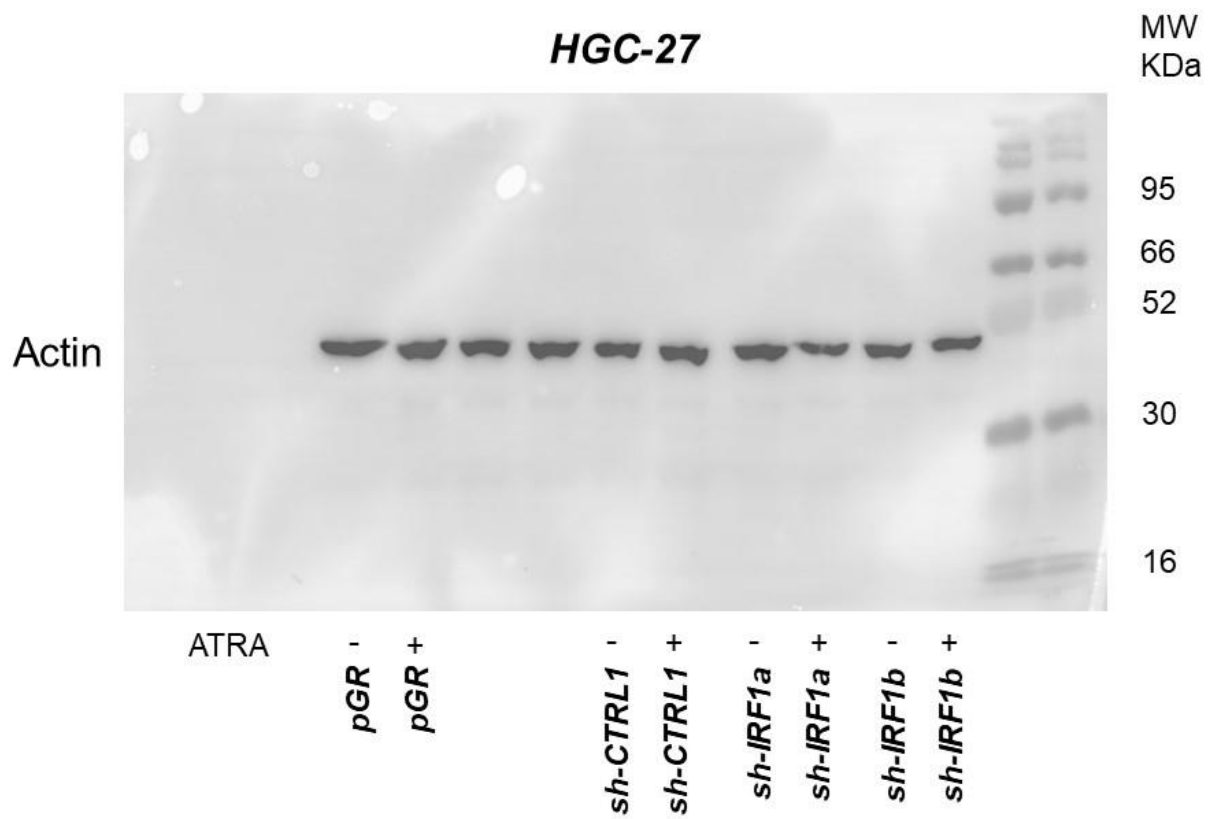

Original Fig 8C

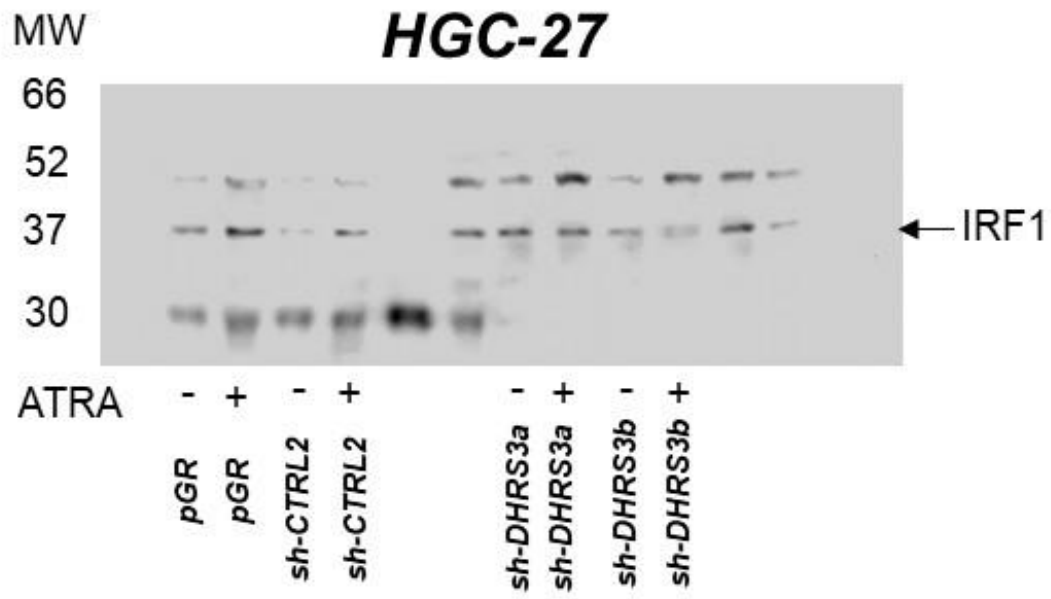

Original Fig 8E

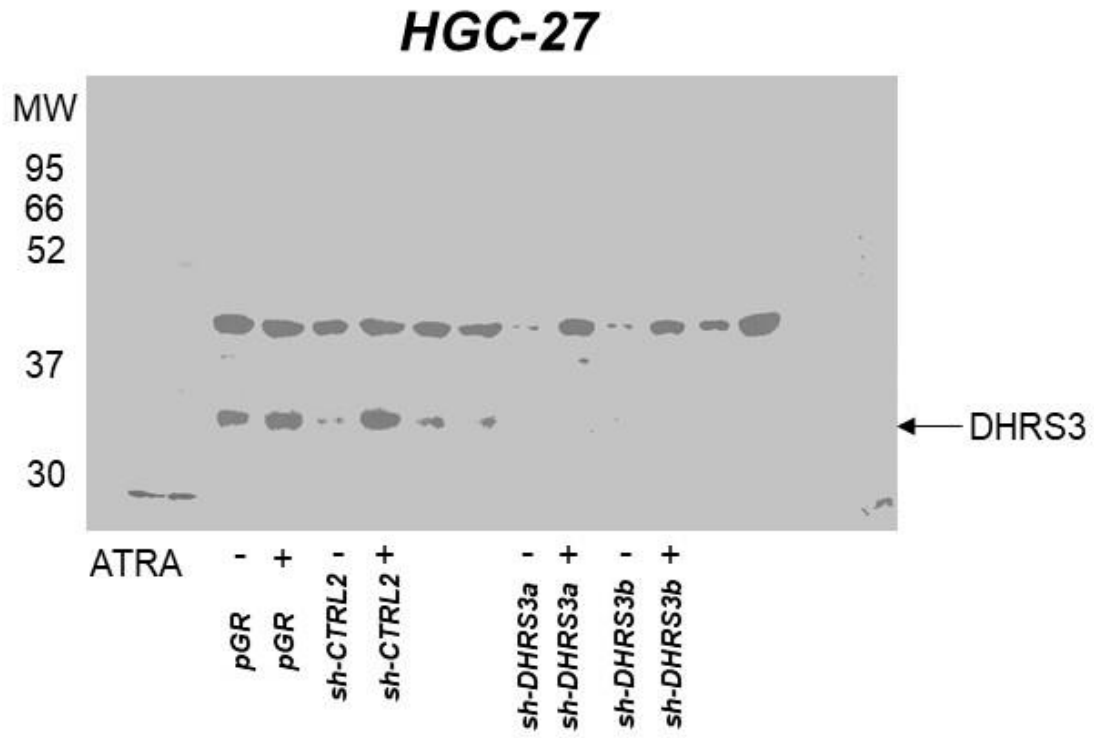

Original Fig 8E

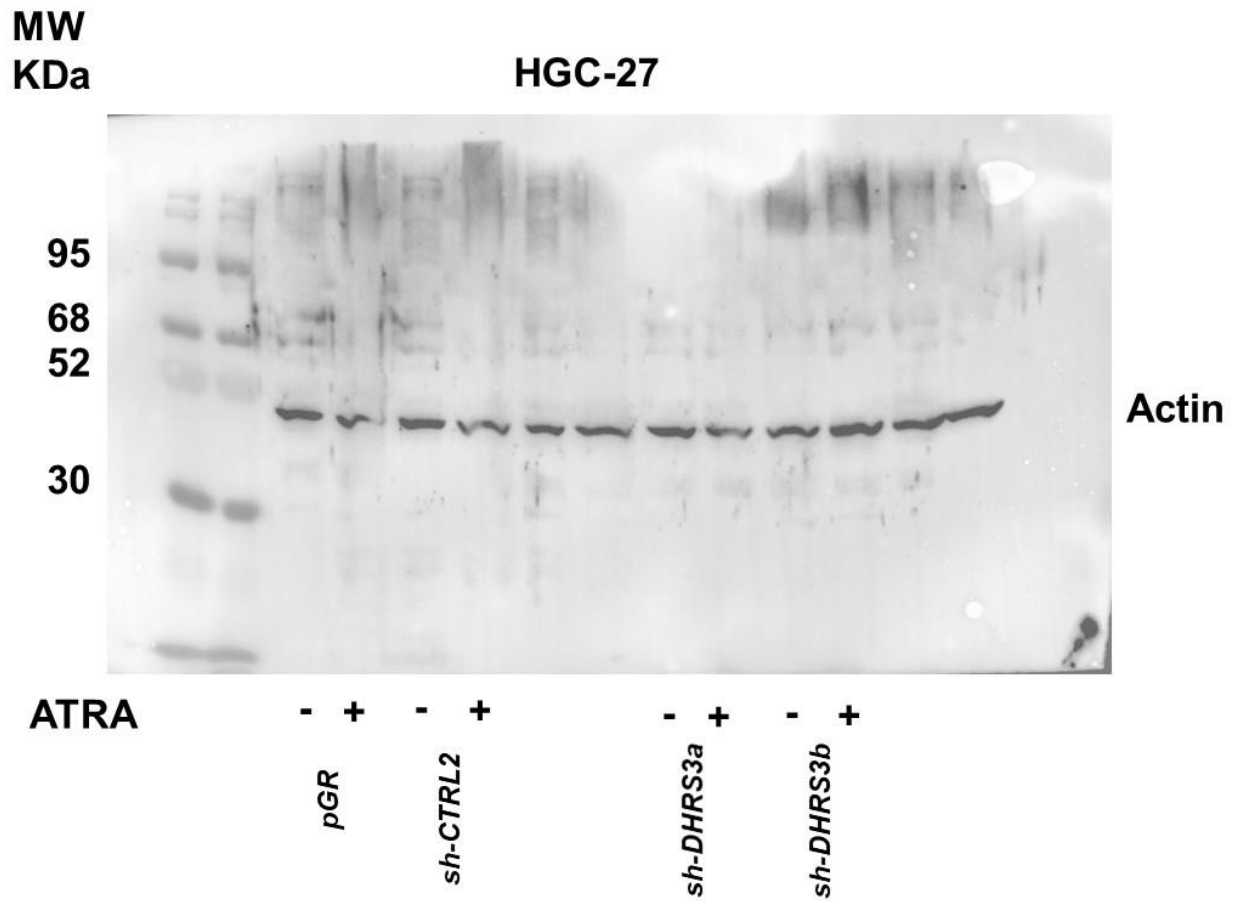

Original Fig 8E

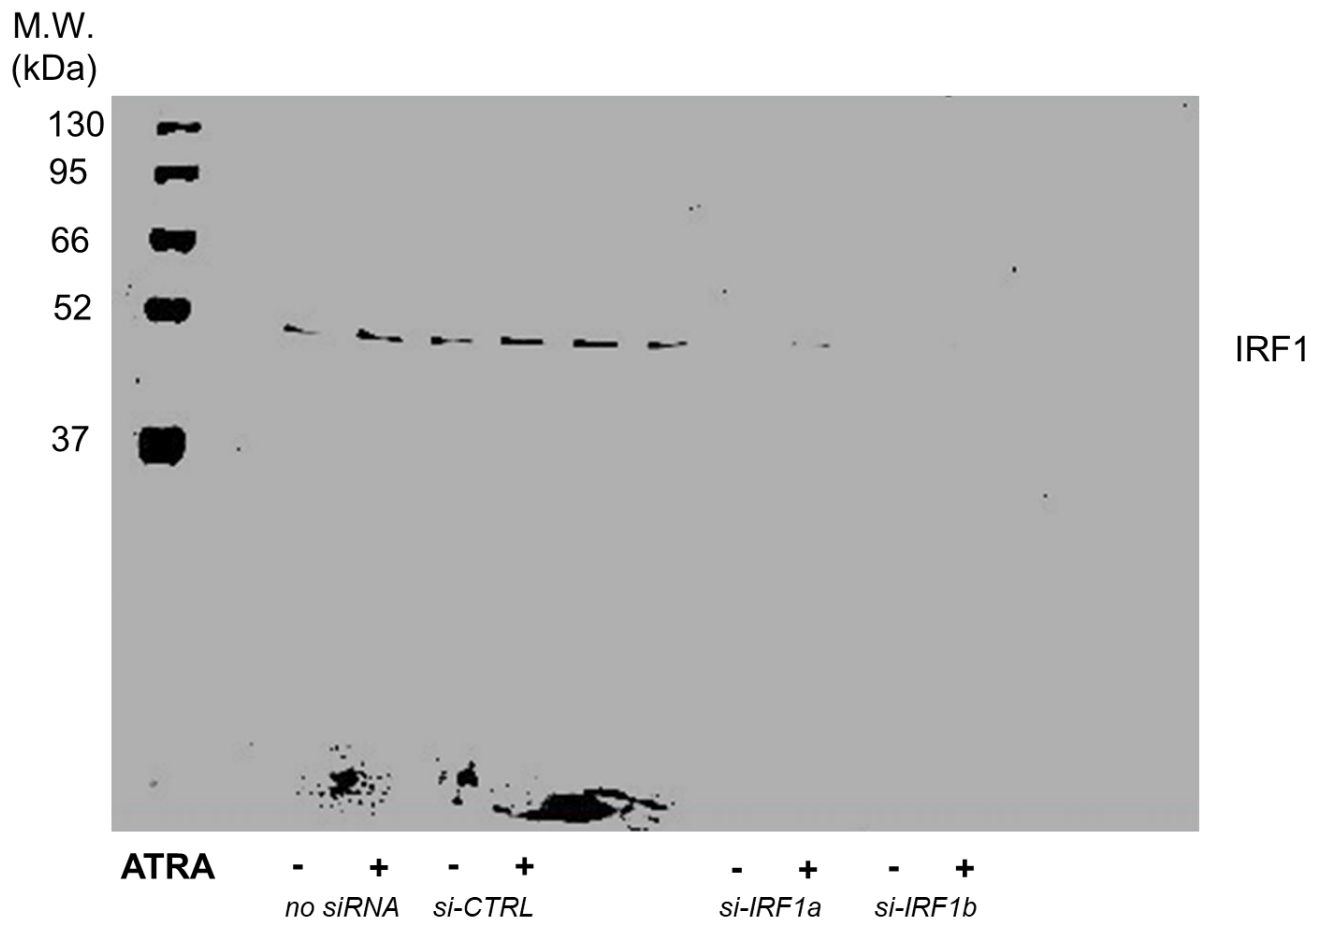

Original Fig S7



M.W.  
(kDa)

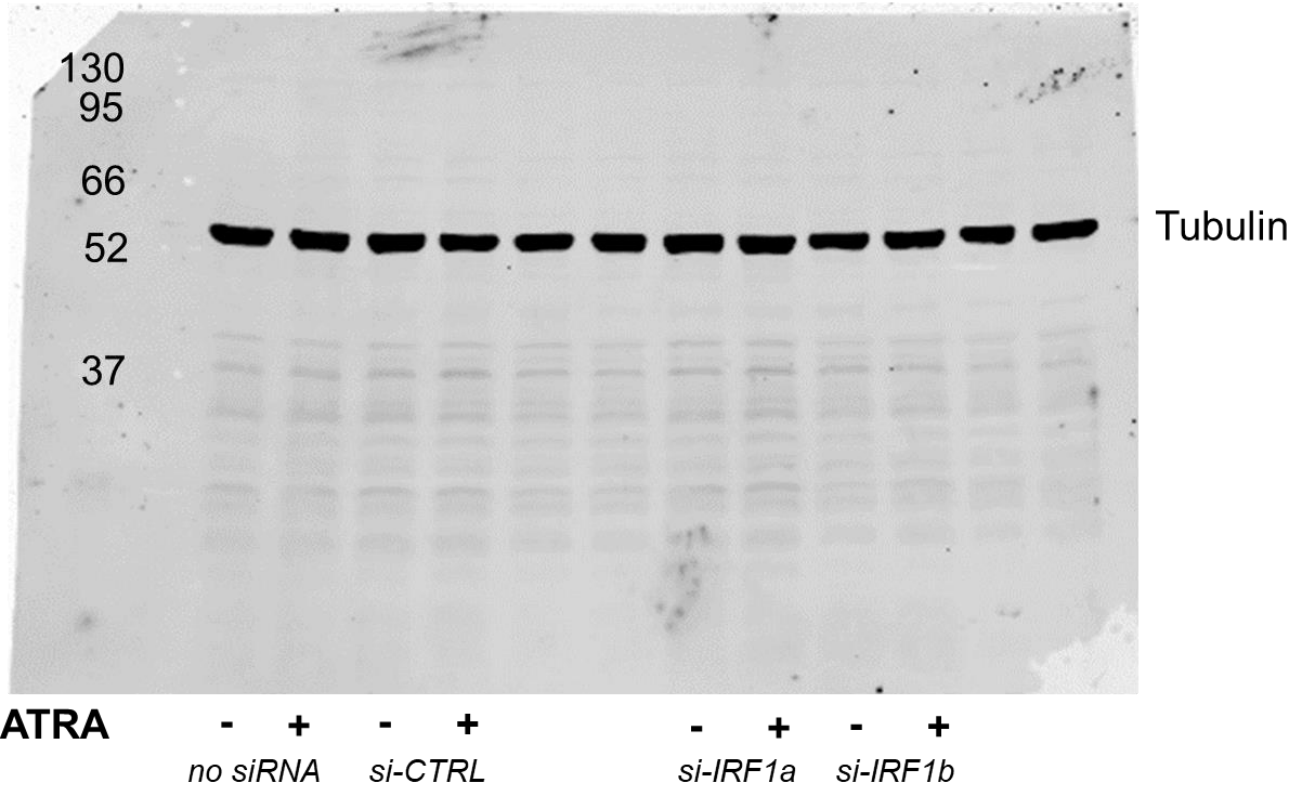

Original Fig S7

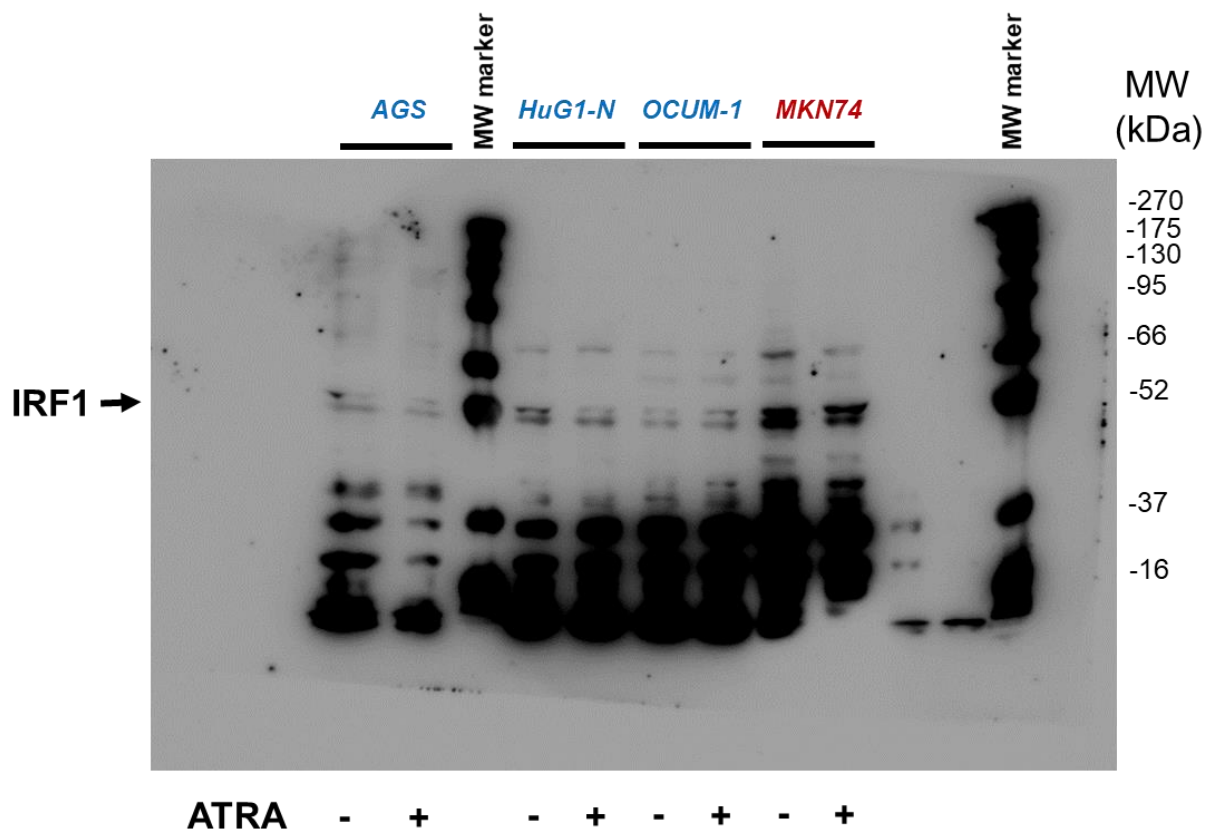

Original Fig S8A

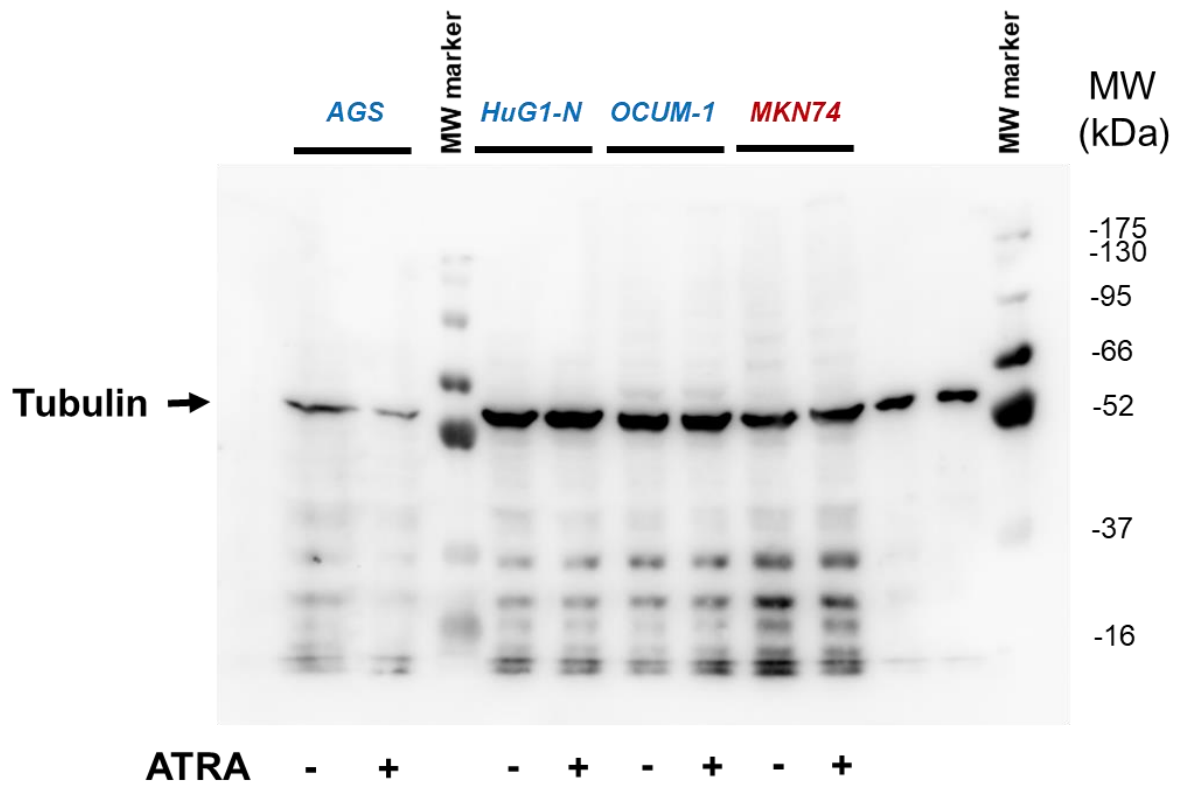

Original Fig S8A

MW  
(kDa)

**KATO-III**

-175  
-130  
-95  
-66  
-52  
-37

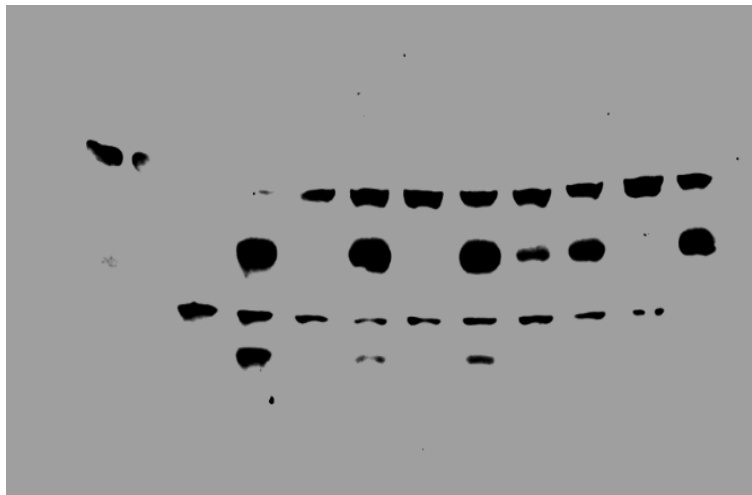

← IRF1

MW  
(kDa)

**ATRA**      -    +

-175  
-130  
-95  
-66  
-52  
-37

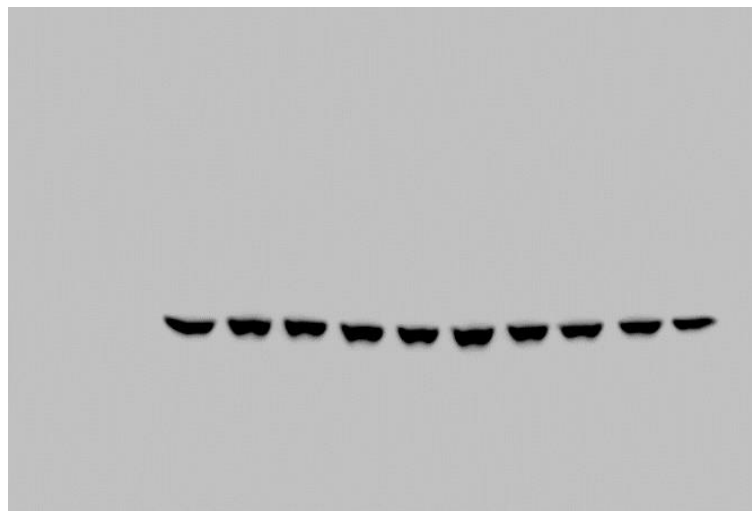

← Tubulin

**ATRA**      -    +

Original Fig S8A
